# Supplementary material for: β-Functionalized push–pull opp-dibenzoporphyrins as sensitizers for dye-sensitized solar cells: the push group effect
Source: Royal Society of Chemistry journal article supplement (doi:10.1039/d1ta07814c), 2021-01-01
Supplement: d1ta07814c1.pdf [file d1ta07814c1.pdf]

## Support Information

### **$\beta$ -Functionalized Push-Pull Opp-Dibenzoporphyrins as Sensitizers for Dye-Sensitized Solar Cells: The Push Group Effect**

Yi Hu, Ajyal Alsaleh, Oanh Trinh, Francis D'Souza\* and Hong Wang\*

Department of Chemistry, University of North Texas, 1155 Union Circle, #305070,  
Denton, TX 76203-5017, USA.

## Table of Contents

|                                                                                        |    |
|----------------------------------------------------------------------------------------|----|
| 1. Supplementary Figures and Tables .....                                              | 3  |
| 1.1 Fluorescence lifetime of <b>YH7</b> – <b>YH10</b> in <i>o</i> -DCB .....           | 3  |
| 1.2 Cyclic voltammograms of <b>YH7</b> – <b>YH10</b> in <i>o</i> -DCB .....            | 4  |
| 1.3 Computational information .....                                                    | 4  |
| 1.4 Solar cell condition optimization .....                                            | 5  |
| 1.5 Photodegradation data.....                                                         | 5  |
| 2. Experimental Section .....                                                          | 10 |
| 2.1 General Experimental Information .....                                             | 10 |
| 2.2 Synthesis .....                                                                    | 10 |
| 2.3 Instruments and measurement .....                                                  | 17 |
| 3. NMR Spectra .....                                                                   | 19 |
| 3. IR Spectra .....                                                                    | 31 |
| 4. Atom Coordinates for Optimized (in Vacuo) Structures <b>YH8</b> – <b>YH10</b> ..... | 34 |
| REFERENCE.....                                                                         | 61 |

## 1. Supplementary Figures and Tables

### 1.1 Fluorescence lifetime of YH7 – YH10 in o-DCB

**Figure S1.** Fluorescence decay profiles of YH8 – YH10 in o-DCB

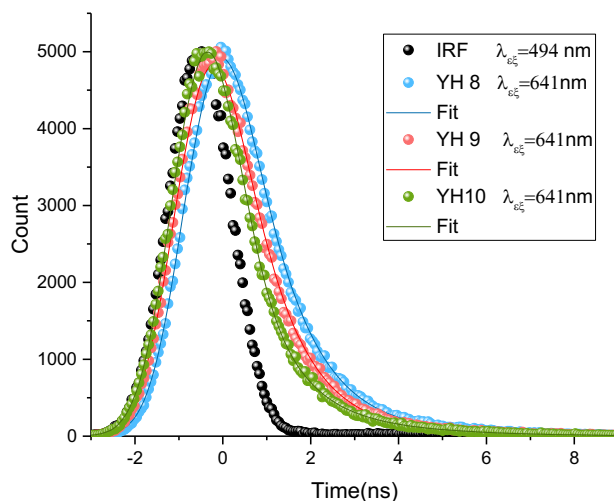

| Compound    | Solvent | $\lambda_{ex}$ (nm) | Time Constants (ns) |                 |                     |
|-------------|---------|---------------------|---------------------|-----------------|---------------------|
| <b>YH8</b>  | DCB     | 641                 | $\tau_1 = 1.18$     |                 |                     |
| <b>YH9</b>  | DCB     | 641                 | $\tau_1 = 1.12$     |                 |                     |
| <b>YH10</b> | DCB     | 641                 | $\tau_1 = 0.37$     | $\tau_2 = 1.24$ | $\tau_{ave} = 0.58$ |

### 1.2 Cyclic voltammograms of YH7 -YH10 in o-DCB.

**Table S1.** Cyclic voltammograms of investigated compounds in o-DCB containing 0.1 M (n-Bu<sub>4</sub>N)ClO<sub>4</sub>. Scan rate = 100 mV/s. The potentials were measured with respect to the Ag/AgCl reference electrode.

| Dye         | $E_{ox}$ (V vs. Ag/Ag <sup>+</sup> ) |                           | $E_{red}$ (V vs. Ag/Ag <sup>+</sup> ) |
|-------------|--------------------------------------|---------------------------|---------------------------------------|
|             | 1 <sup>st</sup> Oxidation            | 2 <sup>nd</sup> Oxidation | 1 <sup>st</sup> Reduction             |
| <b>YH8</b>  | 0.60                                 | 1.02                      | -0.90                                 |
| <b>YH9</b>  | 0.78                                 | 0.99                      | -1.26                                 |
| <b>YH10</b> | 0.89                                 | 1.37                      | -1.21                                 |

**Figure S2.** Cyclic voltammograms of **YH8** – **YH10** in *o*-DCB containing 0.1 M (TBA)ClO<sub>4</sub>.

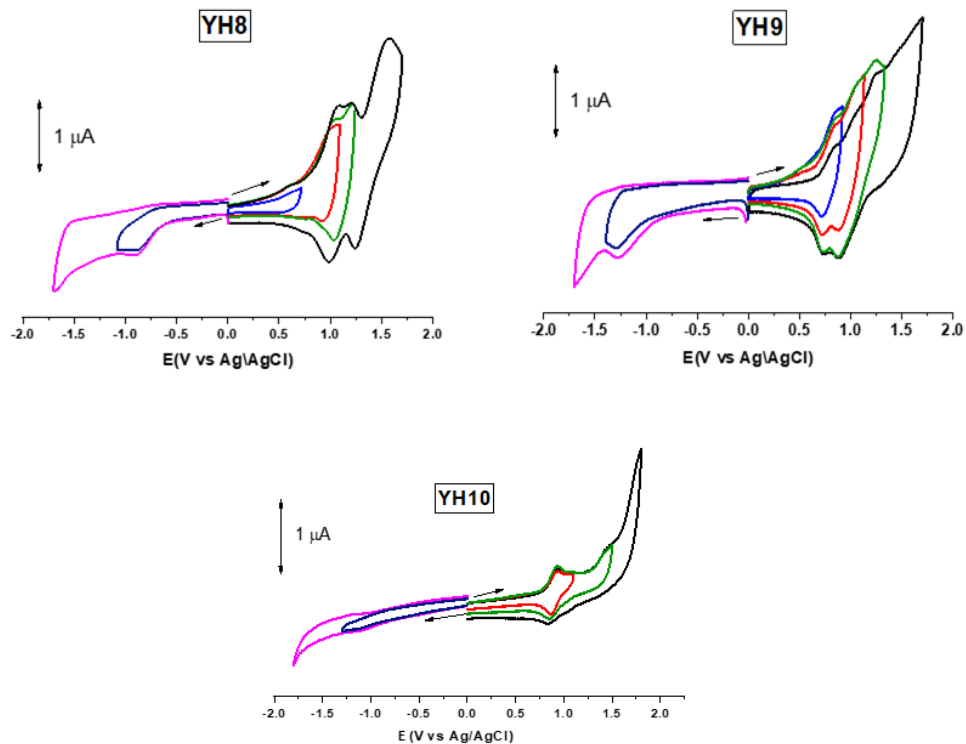

### 1.3 Computational information

All calculations were carried out using Gaussian 09 program. The Calculations were performed by DFT B3LYP with a basis set 6-31G(d,p) for all atoms.<sup>4</sup>

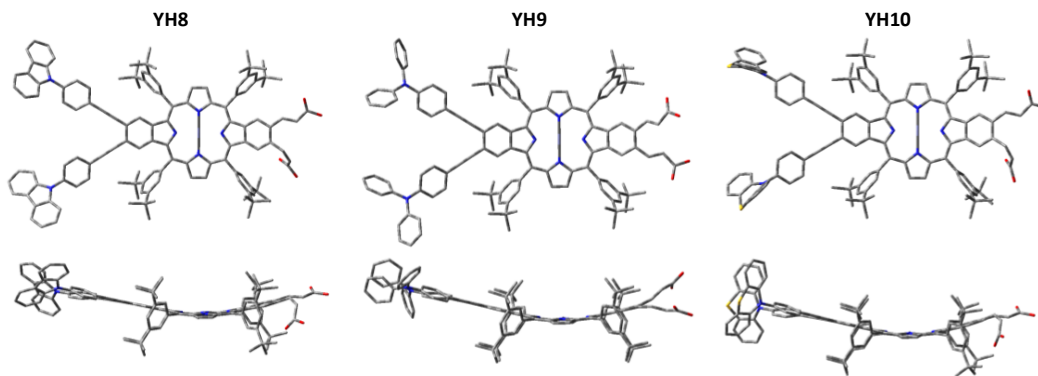

**Figure S3** Geometry-optimized molecule structures of **YH8** – **YH10** (calculated by Gaussian09 DFT B3LYP/6-31G(d,p) in gas phase)

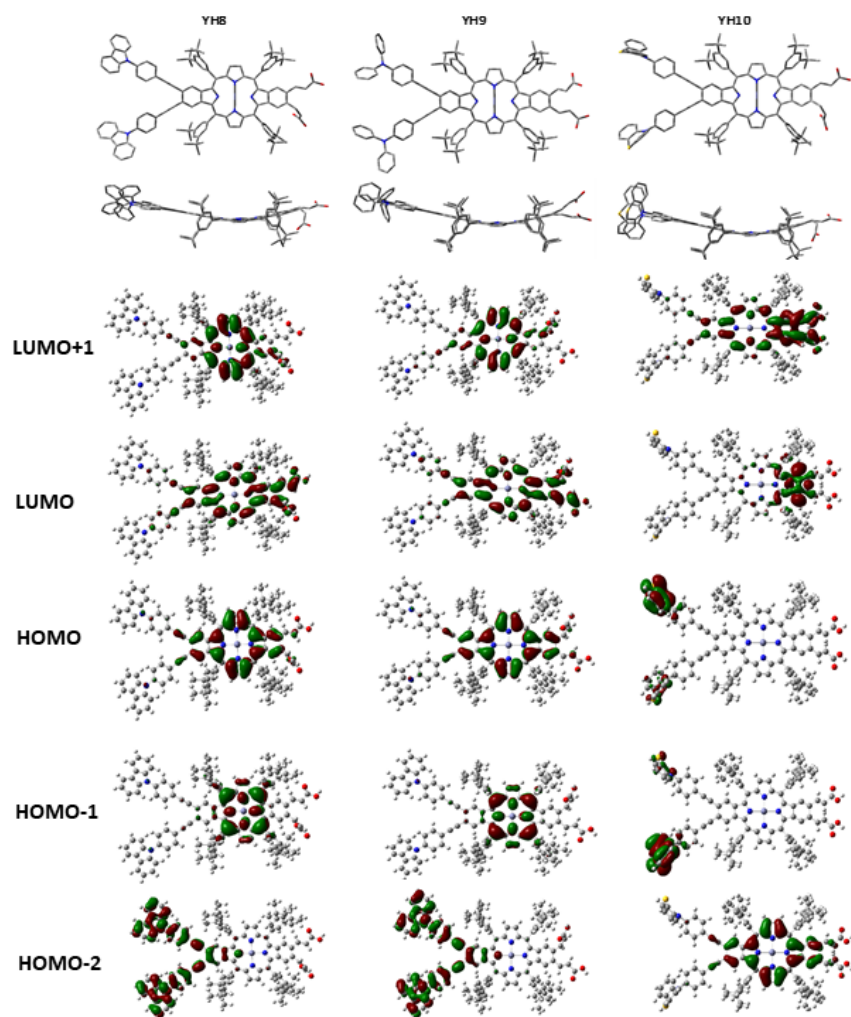

**Figure S4** Geometry-optimized molecule structures of **YH8-YH10** (Top) and Isodensity surface of LUMO+1, LUMO, HOMO, HOMO-1 and HOMO-2 for **YH8-YH10** calculated by Gaussian09 DFT B3LYP/6-31G(d,p) with acetonitrile as the solvent media. Hydrogen atoms were omitted for clarity

#### 1.4 Solar cell condition optimization

Dye concentration, solvent ratio, CDCA concentration and soaking time using **YH10** were optimized to get the best solar cell performance. N719 dye solar cell was used as reference cell for comparison purpose. The condition for N719 dye solar cell is: soaking time 3 h, solvent ratio EtOH/MeCN (v/v) = 1/1, dye concentration 0.2 mM.

#### 1.5 Photodegradation data

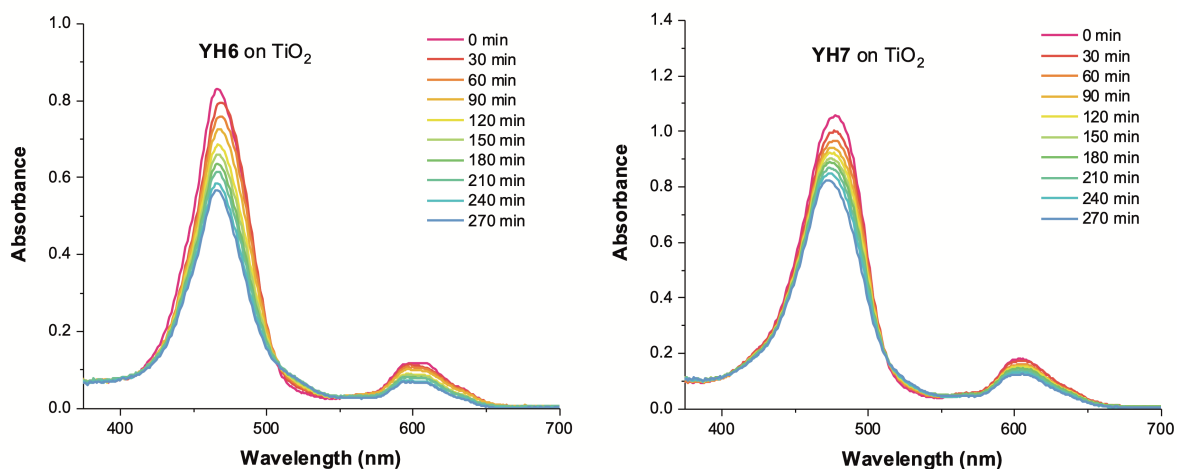

**Figure S5.** Decomposition study on TiO<sub>2</sub> (The TiO<sub>2</sub> films were soaked in a 0.05 mM dye solution for 10 min)

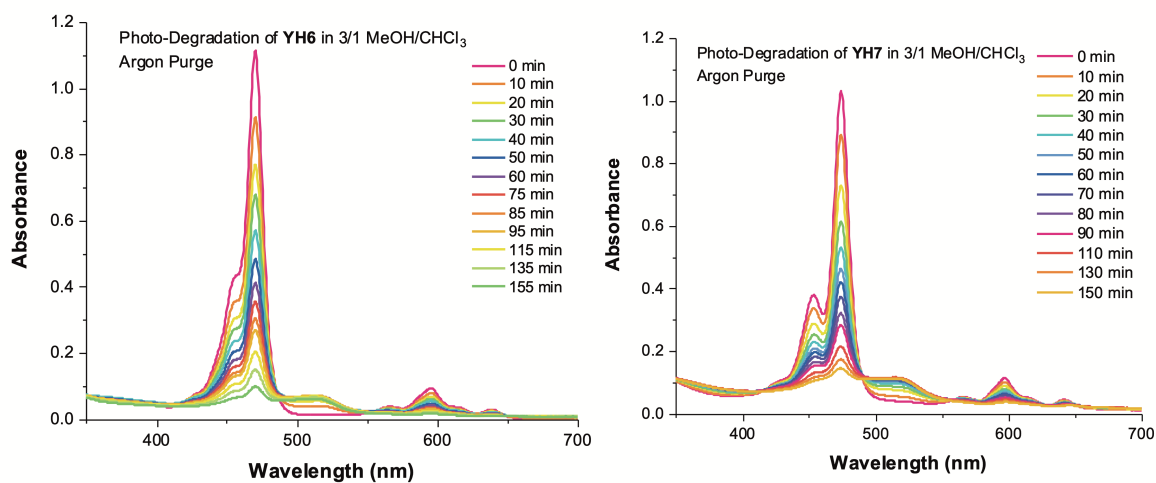

**Figure S6.** Decomposition study in solution (Incident light intensity: 100 mW/cm<sup>2</sup>, Solvent: MeOH/CHCl<sub>3</sub> = 3/1 (v/v), Dye concentration: 2.14 \* 10<sup>-6</sup> mol/L)

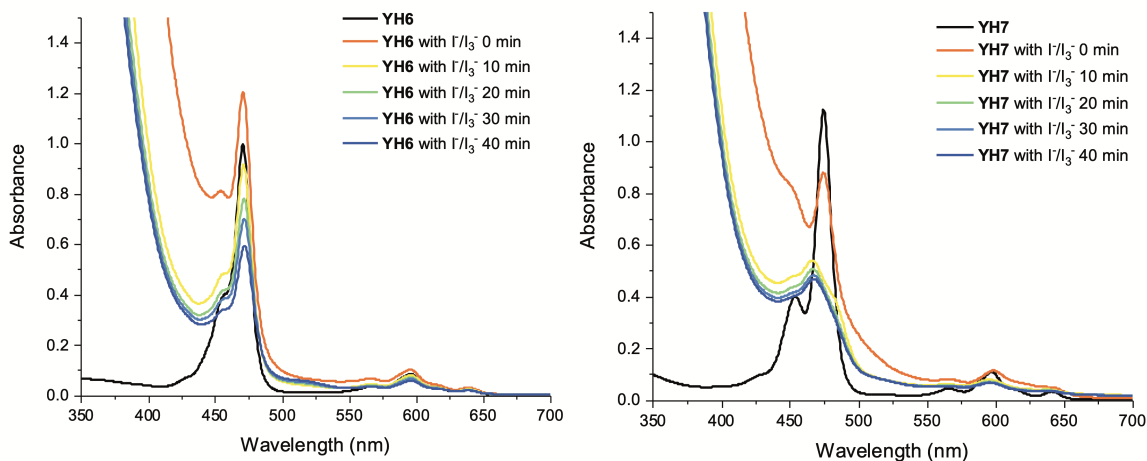

**Figure S7.** Decomposition study in solution in the presence of  $I^-/I_3^-$  electrolyte (Incident light intensity:  $100 \text{ mW/cm}^2$ , Solvent:  $\text{MeOH}/\text{CHCl}_3 = 2/1$  (v/v), Dye concentration:  $2.0 \times 10^{-6} \text{ mol/L}$ , 5 drops of  $I^-/I_3^-$  electrolyte)

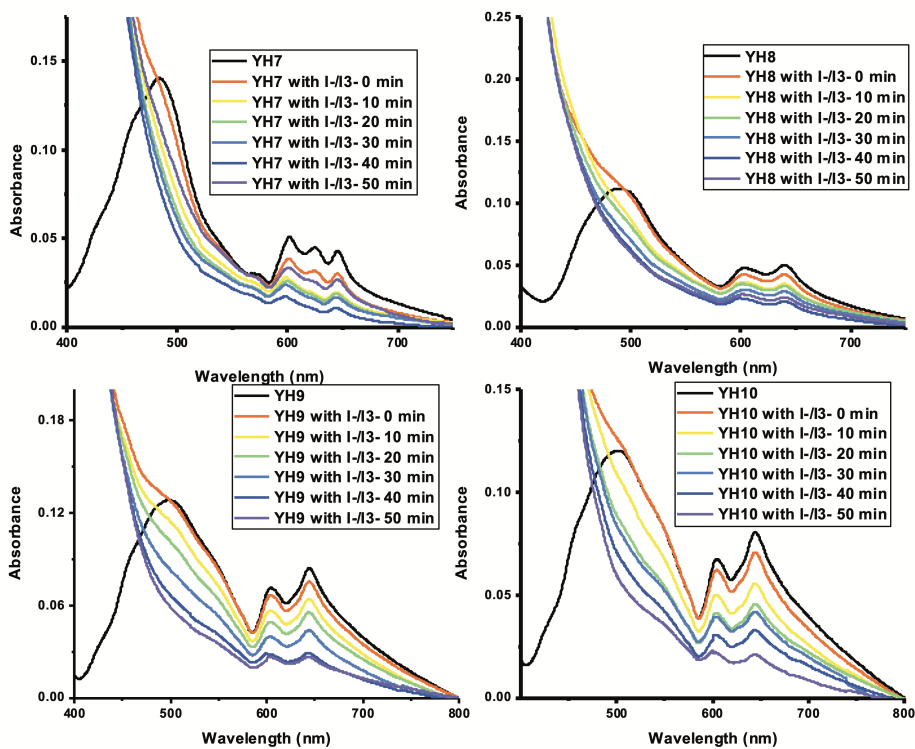

**Figure S8.** Decomposition study in solution in the presence of  $I^-/I_3^-$  electrolyte (Incident light intensity:  $100 \text{ mW/cm}^2$ , Solvent:  $\text{ACN}$ , Dye concentration:  $2.0 \times 10^{-6} \text{ mol/L}$ ,  $5 \mu\text{l}$  of  $I^-/I_3^-$  electrolyte)

**Table S2.** Photovoltaic performance of **YH10** with different dye concentration

| Soaking time: 3 h<br>Solvent ratio: CHCl <sub>3</sub> /t-BuOH = 1/2<br>CDCA concentration: 0 mM |                   |          |          |      |        |
|-------------------------------------------------------------------------------------------------|-------------------|----------|----------|------|--------|
| Condition                                                                                       | Dye Concentration | $J_{SC}$ | $V_{OC}$ | FF   | $\eta$ |
| 1                                                                                               | 0.1 mM            | -14.9    | 0.53     | 0.66 | 5.2%   |
| 2                                                                                               | 0.2 mM            | -14.5    | 0.59     | 0.65 | 5.6%   |
| 3                                                                                               | 0.3 mM            | -15.1    | 0.52     | 0.54 | 4.2%   |
| N719                                                                                            | 0.3 mM            | -15.1    | 0.59     | 0.70 | 6.2%   |

**Table S2** Photovoltaic performance of **YH10** with different solvent ratio

| Dye concentration: 0.2 mM<br>Soaking time: 3 h<br>CDCA concentration: 0 mM |                                 |          |          |      |        |
|----------------------------------------------------------------------------|---------------------------------|----------|----------|------|--------|
| Condition                                                                  | CHCl <sub>3</sub> /t-BuOH (v/v) | $J_{SC}$ | $V_{OC}$ | FF   | $\eta$ |
| 1                                                                          | 1/1                             | -14.7    | 0.54     | 0.60 | 4.8%   |
| 2                                                                          | 2/1                             | -17.0    | 0.56     | 0.58 | 5.5%   |
| 3                                                                          | 3/1                             | -14.9    | 0.55     | 0.59 | 4.8%   |
| 4                                                                          | 4/1                             | -12.3    | 0.53     | 0.57 | 3.7%   |
| 5                                                                          | 5/1                             | -9.3     | 0.52     | 0.51 | 2.5%   |

**Table S3** Photovoltaic performance of **YH10** with different CDCA concentration

| Dye concentration: 0.2 mM<br>Soaking time: 3 h<br>Solvent ratio: CHCl <sub>3</sub> /t-BuOH = 1/2 |                    |          |          |      |        |
|--------------------------------------------------------------------------------------------------|--------------------|----------|----------|------|--------|
| Condition                                                                                        | CDCA Concentration | $J_{SC}$ | $V_{OC}$ | FF   | $\eta$ |
| 1                                                                                                | 0.0 mM             | -18.1    | 0.57     | 0.61 | 6.3%   |
| 2                                                                                                | 0.2 mM             | -15.8    | 0.60     | 0.68 | 6.4%   |
| 3                                                                                                | 0.4 mM             | -6.2     | 0.56     | 0.68 | 2.4%   |
| 4                                                                                                | 0.6 mM             | -13.8    | 0.59     | 0.67 | 5.5%   |
| 5                                                                                                | 0.8 mM             | -7.7     | 0.58     | 0.70 | 3.1%   |
| 6                                                                                                | 1.0 mM             | -12.1    | 0.58     | 0.49 | 3.4%   |

**Table S4** Photovoltaic performance of **YH10** with different soaking time

| Dye concentration: 0.2 mM<br>CDCA concentration: 0.2 mM<br>Solvent ratio: CHCl <sub>3</sub> /t-BuOH = 1/2 |              |          |          |      |        |
|-----------------------------------------------------------------------------------------------------------|--------------|----------|----------|------|--------|
| Condition                                                                                                 | Soaking Time | $J_{SC}$ | $V_{OC}$ | FF   | $\eta$ |
| 1                                                                                                         | 15 h         | -1.4     | 0.29     | 0.52 | 0.2%   |
| 2                                                                                                         | 12 h         | -8.8     | 0.53     | 0.58 | 2.7%   |
| 3                                                                                                         | 9 h          | -13.7    | 0.56     | 0.62 | 4.8%   |
| 4                                                                                                         | 6 h          | -12.9    | 0.57     | 0.65 | 4.8%   |



|                         |      |       |      |      |      |
|-------------------------|------|-------|------|------|------|
| 5                       | 3 h  | -17.9 | 0.58 | 0.68 | 7.1% |
| N719 Dye<br>(Reference) | 16 h | -16.8 | 0.62 | 0.74 | 7.7% |

---

## 2. Experimental Section

### 2.1 General Experimental Information

All reagents were purchased from Aldrich and Fisher and used without further purifications. Solvents used were dried through a commercially available solvent purification system. Column chromatography was performed on silica gel (43 – 63  $\mu\text{m}$ ). All NMR spectra were recorded on a 500 MHz or 400 MHz ( $^1\text{H}$  NMR)/126 MHz or 101 MHz ( $^{13}\text{C}$  NMR) spectrometer. All samples were prepared in  $\text{CDCl}_3$  or  $\text{CDCl}_3$  with one drop of  $d_5$ -pyridine.  $\text{CDCl}_3$  was used as internal standard ( $\delta = 7.26$  and  $77.0$  ppm, respectively). Mass spectra were obtained with a ThermoScientific MALDI-LTQ-XL-Orbitrap mass spectrometer.

### 2.2 Synthesis

#### 9-(4-(But-3-en-1-yn-1-yl)phenyl)-9H-carbazole

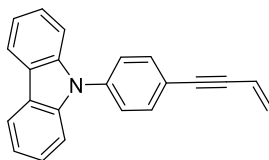

**9-(4-(But-3-en-1-yn-1-yl)phenyl)-9H-carbazole** was synthesized via Sonogashira coupling from the commercially available **9-(4-ethynylphenyl)-9H-carbazole** (see below).

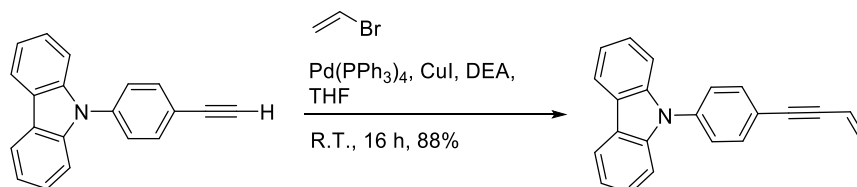

$\text{CuI}$  (2.0 mol%) and  $\text{Pd}(\text{PPh}_3)_4$  (0.3 mol%) were dissolved in anhydrous and degassed diethylamine (0.5 mL/1.0 mmol alkyne) and cooled to  $0^\circ\text{C}$ . Then **9-(4-ethynylphenyl)-9H-carbazole** (660 mg, 2.5 mmol) and vinyl bromide (1 M in THF, 1.3 eq) were added dropwise and the resulting suspension were stirred at room temperature until complete conversion of the starting material. Water was added followed by extraction with  $\text{CH}_2\text{Cl}_2$ , the combined organic layers were washed with 1 M HCl, dried over  $\text{Na}_2\text{SO}_4$  and concentrated under reduced pressure. The crude product was purified by column chromatography (Hexane/ $\text{CH}_2\text{Cl}_2 = 5/1$ ) to afford **9-(4-(but-3-en-1-yn-1-yl)phenyl)-9H-carbazole** as a white solid.

**9-(4-(But-3-en-1-yn-1-yl)phenyl)-9H-carbazole**:  $\text{C}_{22}\text{H}_{17}\text{N}$ ; white solid; yield: 635 mg (2.2 mmol, 87%);  $^1\text{H}$  NMR (400 MHz,  $\text{CDCl}_3$ ): 8.15 (d,  $J = 7.6$  Hz, 2H), 7.71 – 7.63 (m, 2H), 7.58 – 7.51 (m, 2H), 7.46 – 7.38 (m, 5H), 7.35 – 7.27 (m, 2H), 6.08 (dd,  $J = 17.5, 11.1$  Hz, 1H), 5.81 (dd,  $J = 17.6, 1.9$  Hz, 1H), 5.65 – 5.57 (m, 1H);  $^{13}\text{C}$  NMR (101 MHz,  $\text{CDCl}_3$ ):  $\delta$ 140.40, 136.29, 133.02, 127.40, 126.79, 126.03, 123.52, 122.05, 120.35, 120.19, 109.74, 89.21, 88.97 ppm; HRMS (MALDI):  $m/z$ : calcd for  $\text{C}_{22}\text{H}_{17}\text{N}$ : 293.1204; found: 293.1204.

#### 4-(But-3-en-1-yn-1-yl)-N,N-diphenylaniline

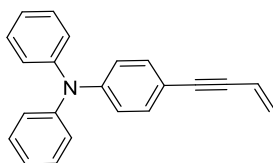

**4-(But-3-en-1-yn-1-yl)-N,N-diphenylaniline** was synthesized via Sonogashira coupling (see below) from **4-ethynyl-N,N-diphenylaniline**. **4-Ethynyl-N,N-diphenylaniline** was synthesized via a three-step pathway according to a published literature.<sup>1</sup>

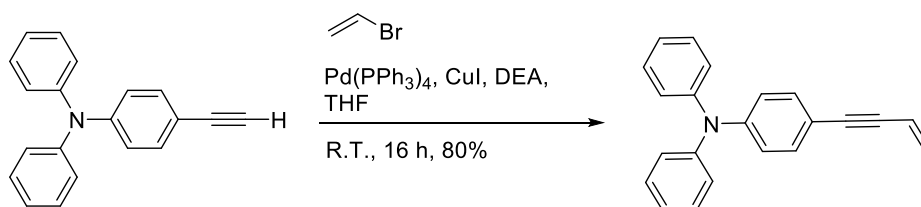

CuI (2.0 mol%) and Pd(PPh<sub>3</sub>)<sub>4</sub> (0.3 mol%) were dissolved in anhydrous and degassed diethylamine (0.5 mL/1.0 mmol alkyne) and cooled to 0 °C. Then **4-ethynyl-N,N-diphenylaniline** (910 mg, 3.4 mmol) and vinyl bromide (1 M in THF, 1.3 eq) were added dropwise and the resulting suspension were stirred at room temperature until complete conversion of the starting material. Water was added followed by extraction with CH<sub>2</sub>Cl<sub>2</sub>, the combined organic layers were washed with 1 M HCl, dried over Na<sub>2</sub>SO<sub>4</sub> and concentrated under reduced pressure. The crude product was purified by column chromatography (Hexane/CH<sub>2</sub>Cl<sub>2</sub> = 5/1) to afford **4-(but-3-en-1-yn-1-yl)-N,N-diphenylaniline** as a white solid.

**4-(But-3-en-1-yn-1-yl)-N,N-diphenylaniline**: C<sub>22</sub>H<sub>15</sub>N; pale yellow solid; yield: 798 mg (2.7 mmol, 80%); <sup>1</sup>H NMR (400 MHz, CDCl<sub>3</sub>): δ 7.30 – 7.26 (m, 2H), 7.26 – 7.23 (m, 1H), 7.12 – 7.03 (m, 7H), 6.99 – 6.93 (m, 2H), 6.01 (dd, J = 17.5, 11.2 Hz, 1H), 5.69 (dd, J = 17.5, 2.1 Hz, 1H), 5.53 – 5.45 (m, 1H) ppm; <sup>13</sup>C NMR (101 MHz, CDCl<sub>3</sub>): δ 148.03, 147.25, 132.66, 129.52, 126.23, 125.07, 123.68, 122.37, 117.46, 115.97, 90.36, 87.55 ppm; HRMS (MALDI): m/z: calcd for C<sub>22</sub>H<sub>15</sub>N: 295.1361; found: 295.1364.

#### 10-(4-(But-3-en-1-yn-1-yl)phenyl)-10H-phenothiazine

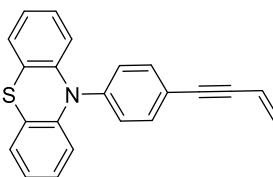

**10-(4-(But-3-en-1-yn-1-yl)phenyl)-10H-phenothiazine** was synthesized via Sonogashira coupling (see below) from **10-(4-ethynylphenyl)-10H-phenothiazine**. **10-(4-Ethynylphenyl)-10H-phenothiazine** was synthesized via a four-step pathway according to a published literature.<sup>2</sup>

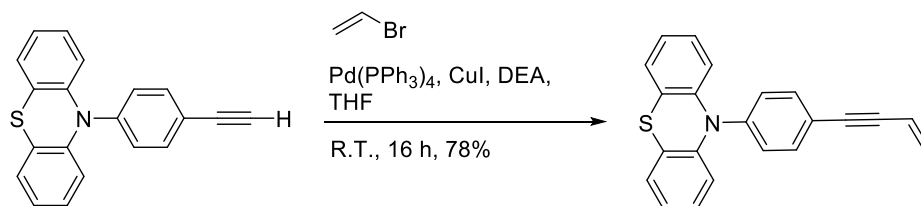

CuI (2.0 mol%) and Pd(PPh<sub>3</sub>)<sub>4</sub> (0.3 mol%) were dissolved in anhydrous and degassed diethylamine (0.5 mL/1.0 mmol alkyne) and cooled to 0 °C. Then **10-(4-ethynylphenyl)-10H-phenothiazine** (1.3 g, 4.3 mmol) and vinyl bromide (1 M in THF, 1.3 eq) were added dropwise and the resulting suspension were stirred at room temperature until complete conversion of the starting material. Water was added followed by extraction with CH<sub>2</sub>Cl<sub>2</sub>, the combined organic layers were washed with 1 M HCl, dried over Na<sub>2</sub>SO<sub>4</sub> and concentrated under reduced pressure. The crude product was purified by column chromatography (Hexane/CH<sub>2</sub>Cl<sub>2</sub> = 3/1) to afford **10-(4-(but-3-en-1-yn-1-yl)phenyl)-10H-phenothiazine** as a white solid.

**10-(4-(But-3-en-1-yn-1-yl)phenyl)-10H-phenothiazine**: C<sub>22</sub>H<sub>15</sub>NS; white solid; yield: 1.1 g (3.4 mmol, 78%); <sup>1</sup>H NMR (400 MHz, CDCl<sub>3</sub>): δ 7.65 (d, J = 7.7 Hz, 2H), 7.33 (d, J = 7.7 Hz, 2H), 7.02 (dd, J = 70.2, 7.1 Hz, 6H), 6.40 (d, J = 7.4 Hz, 2H), 6.09 (dd, J = 17.3, 11.2 Hz, 1H), 5.82 (d, J = 17.4 Hz, 1H), 5.62 (d, J = 11.0 Hz, 1H) ppm; <sup>13</sup>C NMR (101 MHz, CDCl<sub>3</sub>): δ 143.66, 141.57, 133.80, 128.92, 127.40, 127.10, 126.97, 123.15, 122.24, 122.15, 117.52, 117.09, 89.32, 89.15 ppm; HRMS (MALDI): m/z: calcd for C<sub>22</sub>H<sub>15</sub>NS: 325.0925; found: 325.0925.

**Dibromomonobenzoporphyrin 1** was synthesized according to a previously published procedure.<sup>3</sup>

### General procedure for the synthesis of dibenzoporphyrins 2-2H – 4-2H

Dibromomonobenzoporphyrin **1** (250 mg, 0.17 mmol) and K<sub>2</sub>CO<sub>3</sub> (54 mg, 0.38 mmol) were added to a Schlenk flask and dried under vacuum. The vacuum was released under an argon atmosphere to allow the addition of dry THF (20 mL). The mixture was then degassed by three freeze-pump-thaw cycles before the addition of bis(tri-tert-butylphosphine)palladium (36 mg, 0.068 mmol) and the enyne (8-fold excess). The Schlenk flask was then sealed and heated at 45 °C for 48 h. Then the temperature was raised to reflux for 24 h. The progress of the reaction was monitored by UV-Vis spectroscopy and TLC. Upon completing of the reaction, solvent was removed under vacuum and the resulting residue was subjected to silica column chromatography (CH<sub>2</sub>Cl<sub>2</sub>). The band containing desired product was collected and the product was recrystallized using CH<sub>2</sub>Cl<sub>2</sub>/Hexane.

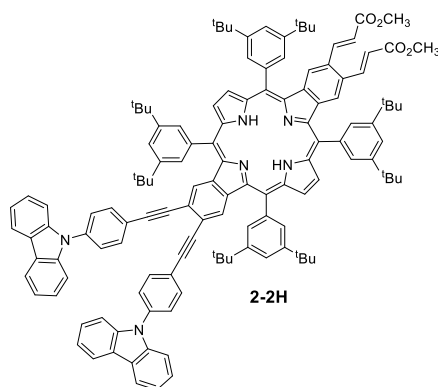

Dibenzoporphyrin **2-2H**: C<sub>132</sub>H<sub>128</sub>N<sub>6</sub>O<sub>4</sub>; purple solid; yield: 68 mg (0.036 mmol, 21%); <sup>1</sup>H NMR (500 MHz, CDCl<sub>3</sub>): δ 8.96 (d, J = 3.6 Hz, 2H), 8.91 (d, J = 4.6 Hz, 2H), 8.17 (d, J = 15.7 Hz, 2H), 8.03 (dd, J = 22.1, 13.2 Hz, 12H), 7.41 (d, J = 8.5 Hz, 4H), 7.30 (dd, J = 10.2, 5.4 Hz, 10H), 7.16 (d, J = 7.8 Hz, 8H), 7.11 – 7.02 (m, 8H), 6.79 (s, 2H), 3.91 (s, 3H), 1.50 (d, J = 8.4 Hz, 72H), -2.57 (s, 2H) ppm. <sup>13</sup>C NMR (126 MHz, CDCl<sub>3</sub>): δ 167.26, 150.86, 150.69, 149.33, 149.20, 142.99, 141.51, 141.47, 141.41, 141.34, 140.71, 139.08, 138.94, 137.72, 133.04, 130.98, 128.41, 128.09,



35.36, 31.94, 31.79 ppm; UV-Vis (THF):  $\lambda_{\text{max}} = 460, 535, 876, 614 \text{ nm}$ ; HRMS (MALDI):  $m/z$ : calcd for  $\text{C}_{132}\text{H}_{128}\text{N}_6\text{O}_4\text{S}_2$ : 1924.9438; found: 1924.9463.

### General procedure for the synthesis of dibenzoporphyrins 2-Zn – 4-Zn

General procedure for the synthesis of dibenzoporphyrins **2-Zn** – **4-Zn**: dibenzoporphyrin **2-2H** – **4-2H** (50 mg) and zinc acetate (10 equiv.) were dissolved in MeOH/ $\text{CHCl}_3$  ( $v/v = 1/3$ ). The mixture was heated at reflux for 12 h. The progress of the reaction was monitored with TLC. Upon completion of the reaction, the solvent was removed and the resulting residue was recrystallized using  $\text{CH}_2\text{Cl}_2/\text{MeOH}$  to afford pure zinc product.

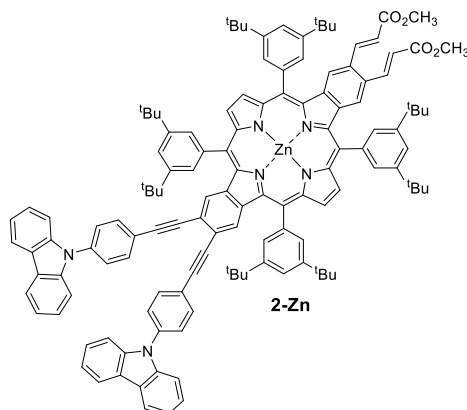

Dibenzoporphyrin **2-Zn**:  $\text{C}_{132}\text{H}_{128}\text{N}_6\text{O}_4\text{Zn}$ ; green solid; yield: 38 mg (0.019 mmol, 74%);  $^1\text{H}$  NMR (500 MHz,  $\text{CDCl}_3$ ):  $\delta$  9.06 (d,  $J = 4.6 \text{ Hz}$ , 2H), 8.99 (d,  $J = 4.6 \text{ Hz}$ , 2H), 8.19 (dd,  $J = 23.1, 11.7 \text{ Hz}$ , 6H), 8.11 – 8.04 (m, 12H), 7.86 (d,  $J = 8.4 \text{ Hz}$ , 4H), 7.68 (d,  $J = 8.4 \text{ Hz}$ , 4H), 7.52 (d,  $J = 9.0 \text{ Hz}$ , 6H), 7.47 – 7.42 (m, 4H), 7.34 – 7.29 (m, 4H), 7.12 (s, 4H), 6.16 (d,  $J = 15.6 \text{ Hz}$ , 6H), 3.93 (s, 6H), 1.57 (s, 36H), 1.50 (s, 36H) ppm.  $^{13}\text{C}$  NMR (126 MHz,  $\text{CDCl}_3$ ):  $\delta$  167.21, 150.72, 150.53, 150.36, 145.01, 144.95, 142.21, 142.13, 141.56, 140.77, 140.71, 139.14, 137.75, 133.07, 131.69, 131.54, 130.78, 129.67, 128.12, 127.84, 127.10, 126.24, 123.99, 123.75, 122.92, 122.52, 122.10, 122.03, 121.05, 120.69, 120.55, 120.41, 109.93, 92.15, 90.97, 51.85, 35.43, 35.36, 31.98, 31.82 ppm; UV-Vis (THF):  $\lambda_{\text{max}} = 479, 596, 620 \text{ nm}$ ; HRMS (MALDI):  $m/z$ : calcd for  $\text{C}_{132}\text{H}_{128}\text{N}_6\text{O}_4\text{Zn}$ : 1922.9132; found: 1922.9144.

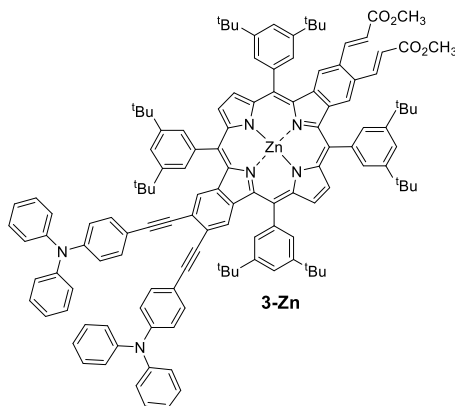

Dibenzoporphyrin **3-Zn**: C<sub>132</sub>H<sub>130</sub>N<sub>6</sub>O<sub>4</sub>Zn; green solid; yield: 39 mg (0.020 mmol, 76%); <sup>1</sup>H NMR (500 MHz, CDCl<sub>3</sub>): δ 9.03 (d, J = 4.7 Hz, 2H), 8.96 (d, J = 4.8 Hz, 2H), 8.21 (d, J = 15.7 Hz, 2H), 8.09 – 7.99 (m, 12H), 7.50 (s, 2H), 7.43 (d, J = 8.4 Hz, 4H), 7.31 (t, J = 7.7 Hz, 8H), 7.17 (d, J = 7.6 Hz, 8H), 7.12 – 7.04 (m, 8H), 6.97 (s, 1H), 6.15 (d, J = 15.7 Hz, 2H), 3.92 (s, 6H), 1.50 (d, J = 8.8 Hz, 72H) ppm; <sup>13</sup>C NMR (126 MHz, CDCl<sub>3</sub>): δ 167.09, 150.48, 150.32, 150.22, 150.18, 147.77, 147.27, 145.22, 144.59, 142.11, 141.95, 141.45, 140.56, 138.57, 132.43, 131.40, 131.25, 130.51, 129.42, 128.88, 127.96, 127.60, 125.07, 123.80, 123.54, 122.60, 122.30, 121.87, 120.78, 120.44, 120.15, 116.80, 93.07, 89.28, 51.68, 35.21, 35.19, 31.79, 31.66 ppm; UV-Vis (THF): λ<sub>max</sub> = 482, 597, 620, 639 nm; HRMS (MALDI): m/z: calcd for C<sub>132</sub>H<sub>132</sub>N<sub>6</sub>O<sub>4</sub>: 1926.9445; found: 1926.9464.

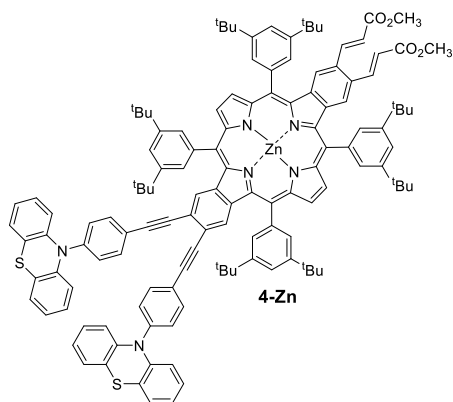

Dibenzoporphyrin **4-Zn**: C<sub>132</sub>H<sub>126</sub>N<sub>6</sub>O<sub>4</sub>S<sub>2</sub>Zn; green solid; yield: 33 mg (0.017 mmol, 64%); <sup>1</sup>H NMR (500 MHz, CDCl<sub>3</sub>): δ 9.06 (d, J = 4.7 Hz, 2H), 8.99 (d, J = 4.7 Hz, 2H), 8.22 (d, J = 15.7 Hz, 2H), 8.11 – 8.03 (m, 14H), 7.79 – 7.73 (m, 4H), 7.52 (s, 2H), 7.41 (d, J = 8.4 Hz, 4H), 7.13 (dd, J = 7.6, 1.6 Hz, 4H), 7.08 (s, 2H), 7.02 – 6.96 (m, 4H), 6.92 (td, J = 7.4, 1.2 Hz, 4H), 6.51 (dd, J = 8.2, 1.2 Hz, 4H), 6.16 (d, J = 15.6 Hz, 2H), 3.93 (s, 6H), 1.55 (s, 36H), 1.51 (s, 36H) ppm; <sup>13</sup>C NMR (126 MHz, CDCl<sub>3</sub>): δ 167.24, 150.68, 150.52, 150.51, 150.35, 145.01, 144.94, 143.77, 142.19, 142.09, 141.79, 141.55, 140.75, 139.08, 133.72, 131.68, 131.52, 130.76, 129.57, 128.65, 128.11, 127.81, 127.33, 127.14, 123.98, 123.40, 122.89, 122.69, 122.52, 122.08, 122.06, 121.04, 120.68, 120.39, 119.51, 118.04, 92.13, 90.99, 51.85, 35.40, 35.35, 31.96, 31.81 ppm; UV-Vis (THF): λ<sub>max</sub> = 479, 596, 620 nm; HRMS (MALDI): m/z: calcd for C<sub>132</sub>H<sub>132</sub>N<sub>6</sub>O<sub>4</sub>S<sub>2</sub>: 1986.8573; found: 1986.8529.

### General procedure for the synthesis of porphyrin dye YH8 – YH10

The zinc inserted product **2-Zn** – **4-Zn** (30 mg) was dissolved in THF (6 mL). A solution of 20% NaOH (aq) (1 mL) and MeOH (2 mL) were added. The mixture was heated at reflux for 12 h. The progress of the reaction was monitored by TLC. upon completion, the mixture was washed with 10% citric acid solution, water and extracted using ethyl acetate. The organic layer was separated and the solvent was removed under reduced pressure. Pure product **YH8** – **YH10** were obtained after recrystallization using CH<sub>2</sub>Cl<sub>2</sub>/MeOH.

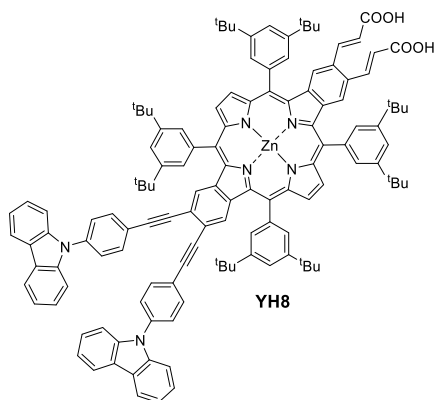

Porphyrin Dye **YH8**:  $C_{132}H_{128}N_6O_4Zn$ ; green solid; yield: 26 mg (0.014 mmol, 98%);  $^1H$  NMR (500 MHz,  $CDCl_3/d_5$ -pyridine):  $\delta$  8.99 (d,  $J = 4.4$  Hz, 2H), 8.93 (d,  $J = 4.6$  Hz, 2H), 8.27 (d,  $J = 15.6$  Hz, 2H), 8.14 (d,  $J = 7.9$  Hz, 12H), 8.05 (d,  $J = 21.3$  Hz, 7H), 7.83 (d,  $J = 7.9$  Hz, 4H), 7.64 (d,  $J = 8.2$  Hz, 6H), 7.50 (d,  $J = 8.4$  Hz, 6H), 7.45 – 7.39 (m, 4H), 7.32 – 7.27 (m, 4H), 7.06 (s, 2H), 4.75 (s, 2H), 1.53 (s, 36H), 1.50 (s, 36H) ppm;  $^{13}C$  NMR (126 MHz,  $CDCl_3/d_5$ -pyridine):  $\delta$  169.17, 150.49, 150.25, 150.14, 144.67, 144.27, 142.77, 142.70, 141.05, 140.66, 139.48, 137.53, 132.98, 131.27, 130.83, 129.57, 128.09, 127.91, 127.02, 126.18, 123.66, 121.29, 120.47, 120.33, 120.20, 109.91, 91.66, 91.20, 35.31, 35.28, 31.93, 31.84 ppm; UV-Vis (THF):  $\lambda_{max}(\log \epsilon) = 477(5.64)$ ,  $596(4.61)$ ,  $618(4.42)$ ,  $637(4.06)$  nm; HRMS (MALDI):  $m/z$ : calcd for  $C_{132}H_{128}N_6O_4Zn$ : 1894.8819; found: 1894.8869.

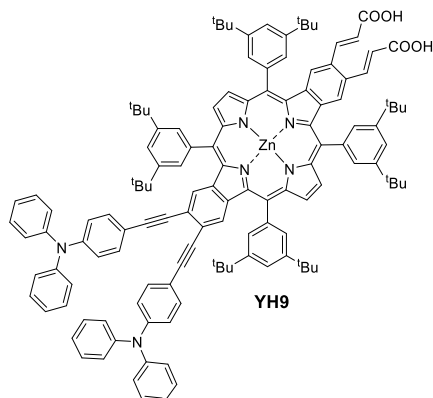

Porphyrin dye **YH9**:  $C_{132}H_{130}N_6O_4Zn$ ; green solid; yield: 26 mg (0.014 mmol, 87%);  $^1H$  NMR (500 MHz,  $CDCl_3/d_5$ -pyridine):  $\delta$  8.94 (d,  $J = 4.5$  Hz, 2H), 8.89 (d,  $J = 4.7$  Hz, 2H), 8.26 (d,  $J = 15.2$  Hz, 2H), 7.99 (dd,  $J = 37.7, 13.1$  Hz, 16H), 7.47 (s, 2H), 7.40 (d,  $J = 8.5$  Hz, 4H), 7.13 (d,  $J = 7.6$  Hz, 10H), 7.04 (dd,  $J = 14.3, 7.9$  Hz, 10H), 6.91 (s, 2H), 6.17 (s, 2H), 4.72 (s, 2H), 1.47 (d,  $J = 6.8$  Hz, 72H) ppm;  $^{13}C$  NMR (126 MHz,  $CDCl_3/d_5$ -pyridine):  $\delta$  169.23, 150.25, 150.13, 150.11, 150.06, 147.72, 147.36, 144.59, 144.44, 142.74, 140.97, 139.10, 135.89, 132.45, 131.19, 131.10, 129.47, 128.89, 128.06, 127.80, 125.07, 123.55, 122.45, 122.34, 121.99, 120.28, 120.07, 92.73, 92.67, 89.61, 35.24, 35.22, 31.86, 31.81 ppm; UV-Vis (THF):  $\lambda_{max}(\log \epsilon) = 460(5.07)$ ,  $480(5.47)$ ,  $597(4.53)$ ,  $618(4.32)$ ,  $639(4.05)$  nm; HRMS (MALDI):  $m/z$ : calcd for  $C_{132}H_{132}N_6O_4$ : 1898.9132; found: 1898.9163.



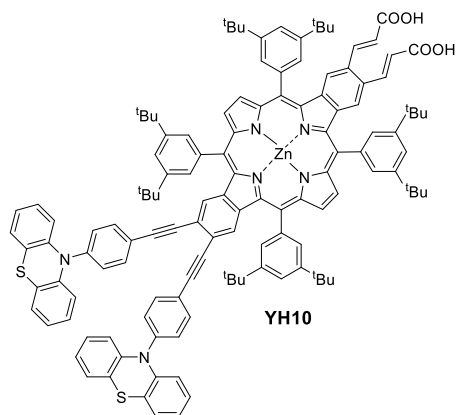

Porphyrin dye **YH10**:  $C_{132}H_{126}N_6O_4S_2Zn$ ; green solid; yield: 30 mg (0.015 mmol, 99%);  $^1H$  NMR (500 MHz,  $CDCl_3/d_5$ -pyridine):  $\delta$  8.97 (d,  $J = 4.6$  Hz, 2H), 8.93 (d,  $J = 4.7$  Hz, 2H), 8.27 (d,  $J = 15.5$  Hz, 2H), 8.02 (d,  $J = 9.2$  Hz, 7H), 7.75 (d,  $J = 8.2$  Hz, 3H), 7.48 (s, 2H), 7.39 (d,  $J = 8.3$  Hz, 4H), 7.10 (d,  $J = 7.6$  Hz, 4H), 7.02 (s, 2H), 6.92 (dt,  $J = 14.5, 7.0$  Hz, 7H), 6.19 (d,  $J = 15.7$  Hz, 2H), 1.51 (d,  $J = 4.6$  Hz, 72H) ppm;  $^{13}C$  NMR (126 MHz,  $CDCl_3/d_5$ -pyridine):  $\delta$  169.21, 150.19, 150.11, 149.84, 149.71, 144.23, 143.76, 142.68, 141.50, 141.01, 139.41, 133.62, 131.28, 130.82, 129.49, 128.84, 128.06, 127.86, 127.20, 127.06, 125.54, 123.72, 123.57, 122.53, 122.39, 121.83, 121.71, 121.29, 120.38, 120.17, 117.80, 91.62, 91.24, 35.26, 31.88, 31.82 ppm; UV-Vis (THF):  $\lambda_{max}(\log \epsilon) = 478(5.33), 598(4.60), 628(4.38)$  nm; HRMS (MALDI):  $m/z$ : calcd for  $C_{132}H_{132}N_6O_4S_2$ : 1958.8260; found: 1958.8244.

## 2.3 Instruments and measurement

The steady state fluorescence spectra were measured using a Horiba Jobin Yvon Nanolog UV-visible-NIR spectrofluorimeter equipped with a PMT (for UV-visible) and InGaAs (for NIR) detectors. Differential pulse and cyclic voltammograms were recorded on an EG&G 263A potentiostat/galvanostat using a three-electrode system. A platinum button electrode was used as the working electrode, while a platinum wire served as the counter electrode and an Ag/AgCl electrode was used as the reference electrode. Ferrocene/ferrocenium redox couple was used as an internal standard. All the solutions were purged prior to electrochemical and spectral measurements with nitrogen gas. Fluorescence lifetimes were measured using time correlated single photon counting (TCSPC) technique using nanoLED excitation sources. The emission was collected at emission peak maxima of a given compound.

### 2.3.1 Photovoltaic measurement

Photovoltaic measurements were performed using the Grätzel-type two-electrode system using FTO (~10-12 microns, tec7 grade from Pilkington) glass coated with thin film  $TiO_2$  as the working electrode and Pt-ized FTO as the counter electrode. The thin film  $TiO_2$  was prepared via the "Doctor blade" technique as reported earlier. A mediator solution containing 0.6 M PMII ionic liquid, 0.1 M Lil, 0.05 M I<sub>2</sub>, and 0.5 M 4-t-butylpyridine in acetonitrile was injected between the electrodes.

The photocurrent-photovoltage characteristics of the solar cells were measured with a Keithley 2400 source meter and solar simulator (SolarLight, Inc.). IPCE spectra were measured against a calibrated silicon photodiode using monochromatic light from a Xenon lamp (PV Measurements QEX7).

### 2.3.2 Electrochemical impedance measurement

Electrochemical impedance measurements were performed using EG&G PARSTAT 4000A potentiostat/galvanostat. Impedance data were recorded under forward bias condition from 100 kHz to 10 mHz with an AC amplitude of 10 mV. Data were recorded under dark and A.M 1.5 illumination conditions applying corresponding open circuit potential (VOC). The data were analyzed using ZSimpwin software from Princeton Applied Research. Solution resistance ( $R_s$ ), charge transfer resistance ( $R_{ct}$ ), and capacitance due to constant phase element (Q) were deduced from the fitted data. CPE was considered as capacitance component of the double layer electrode interface due to roughness of the electrode.

### 3. NMR Spectra

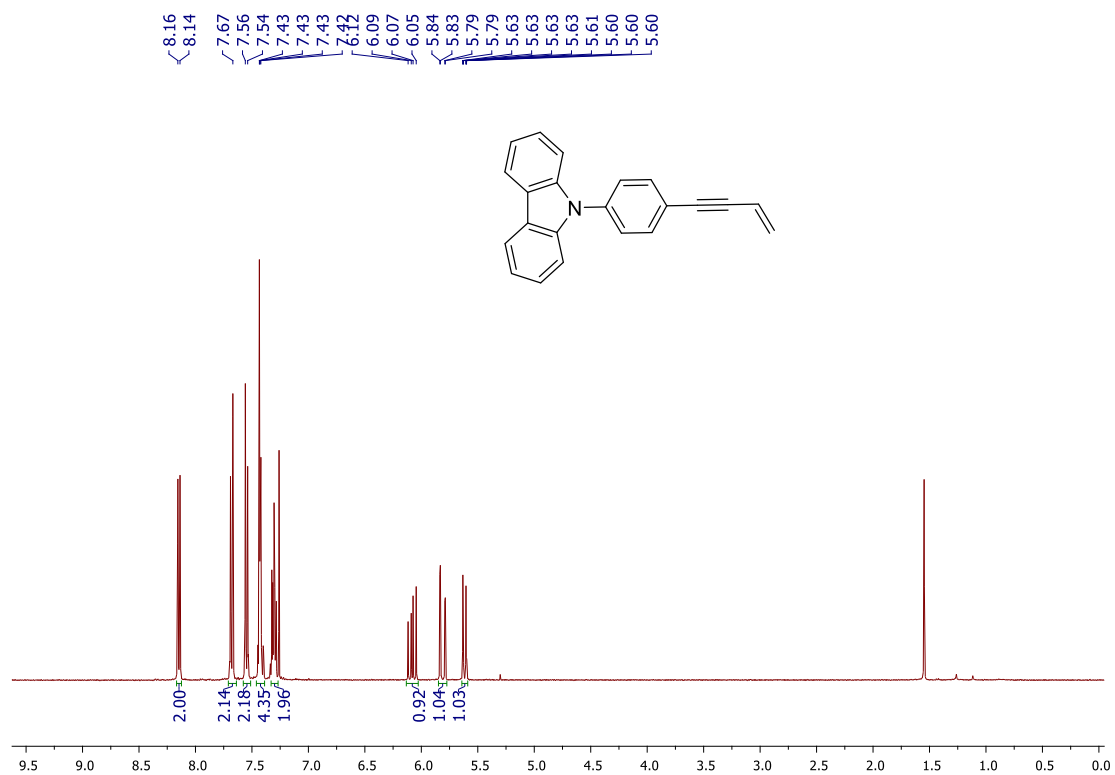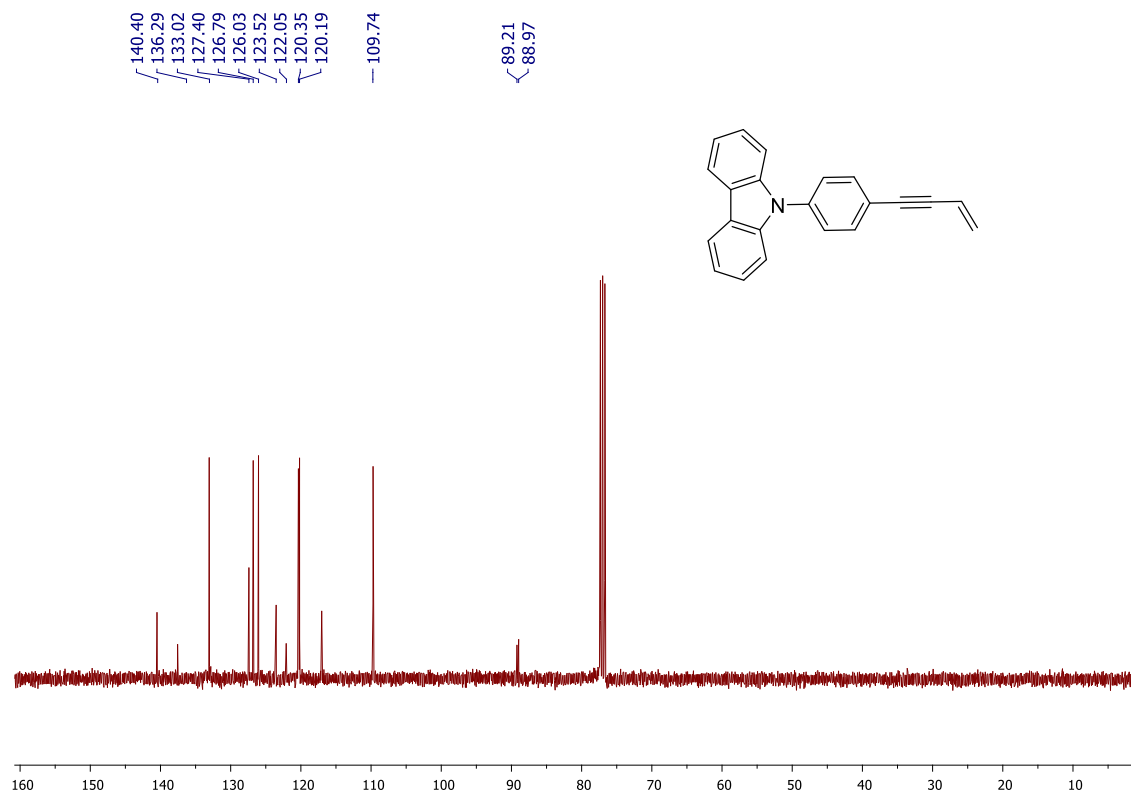

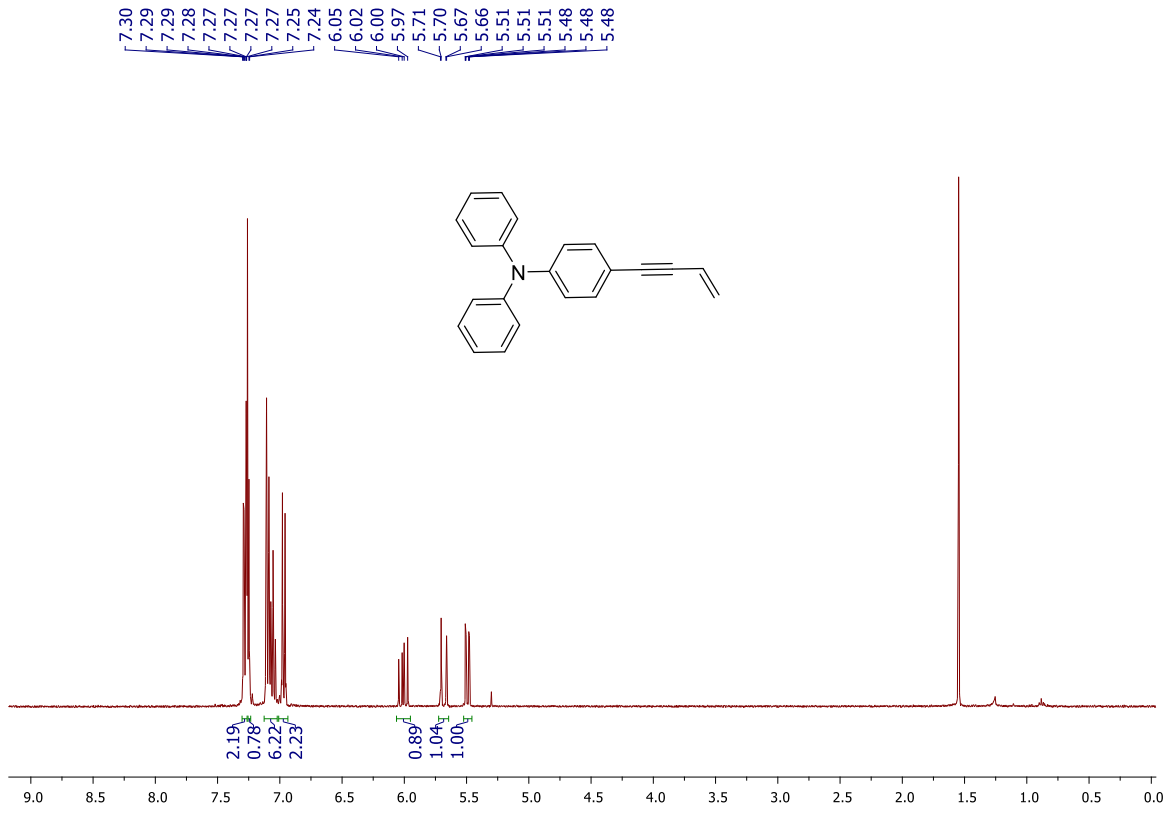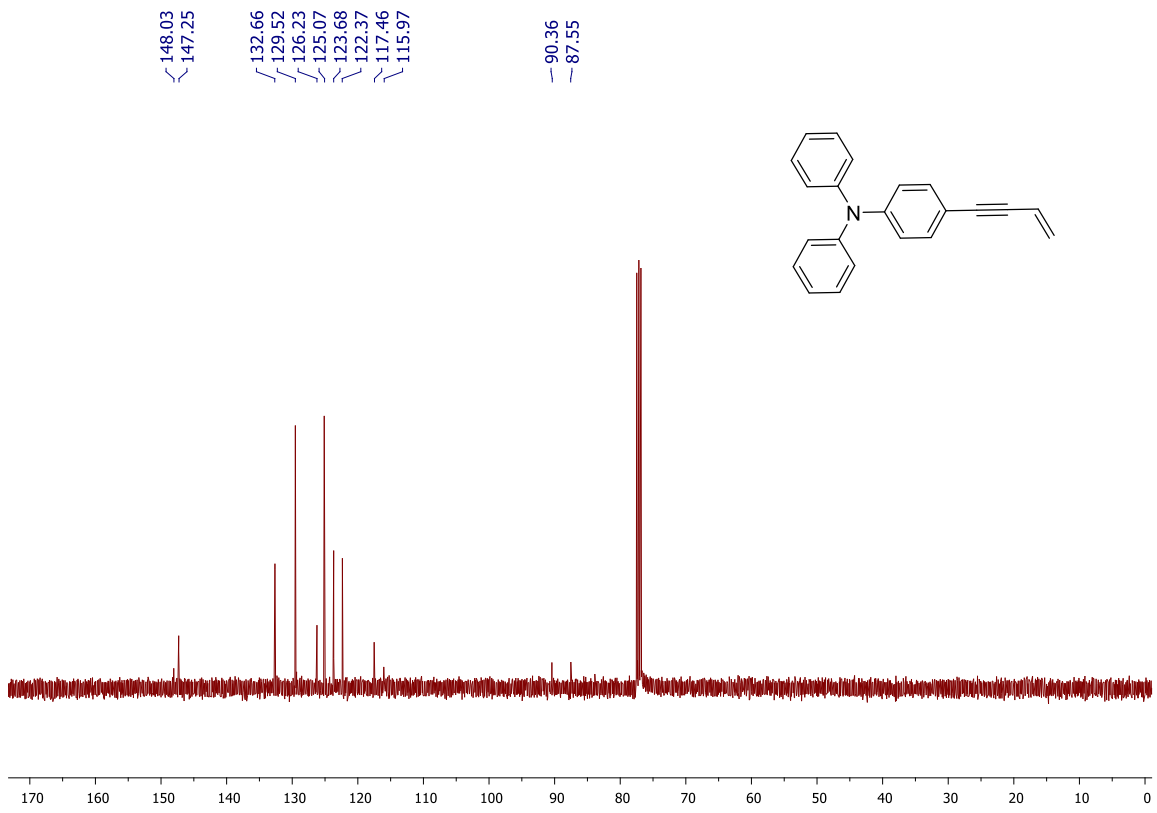

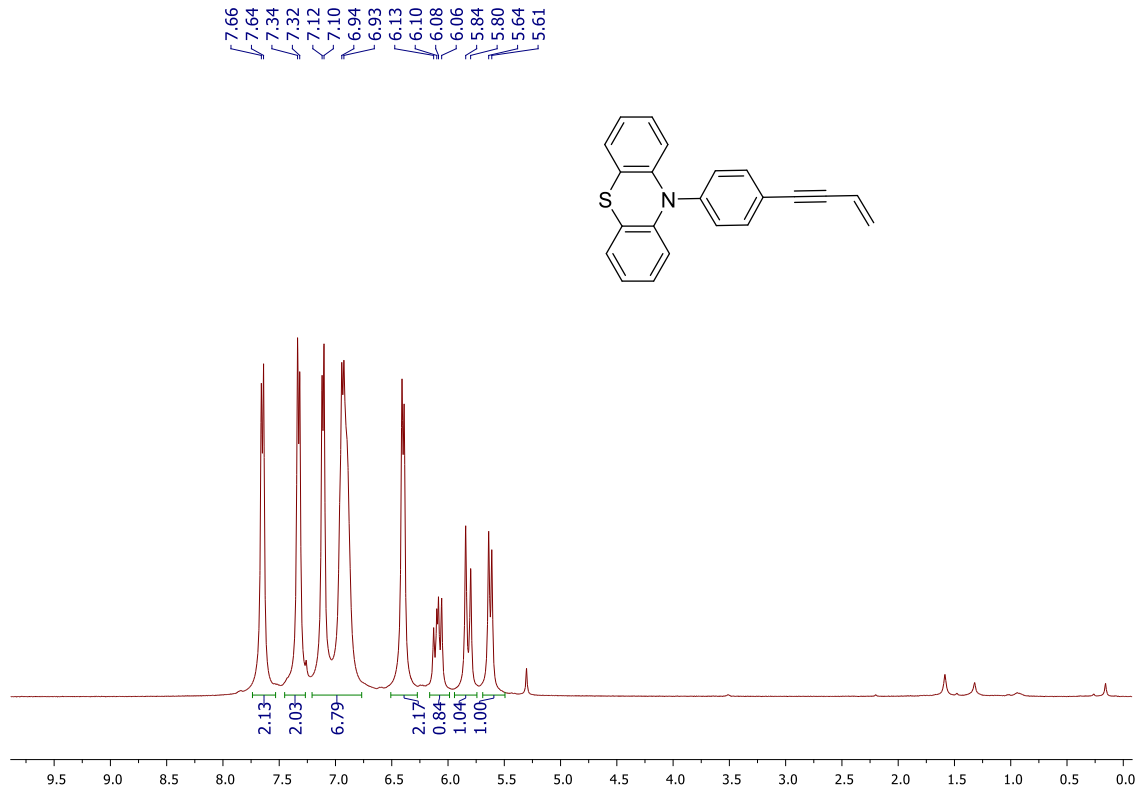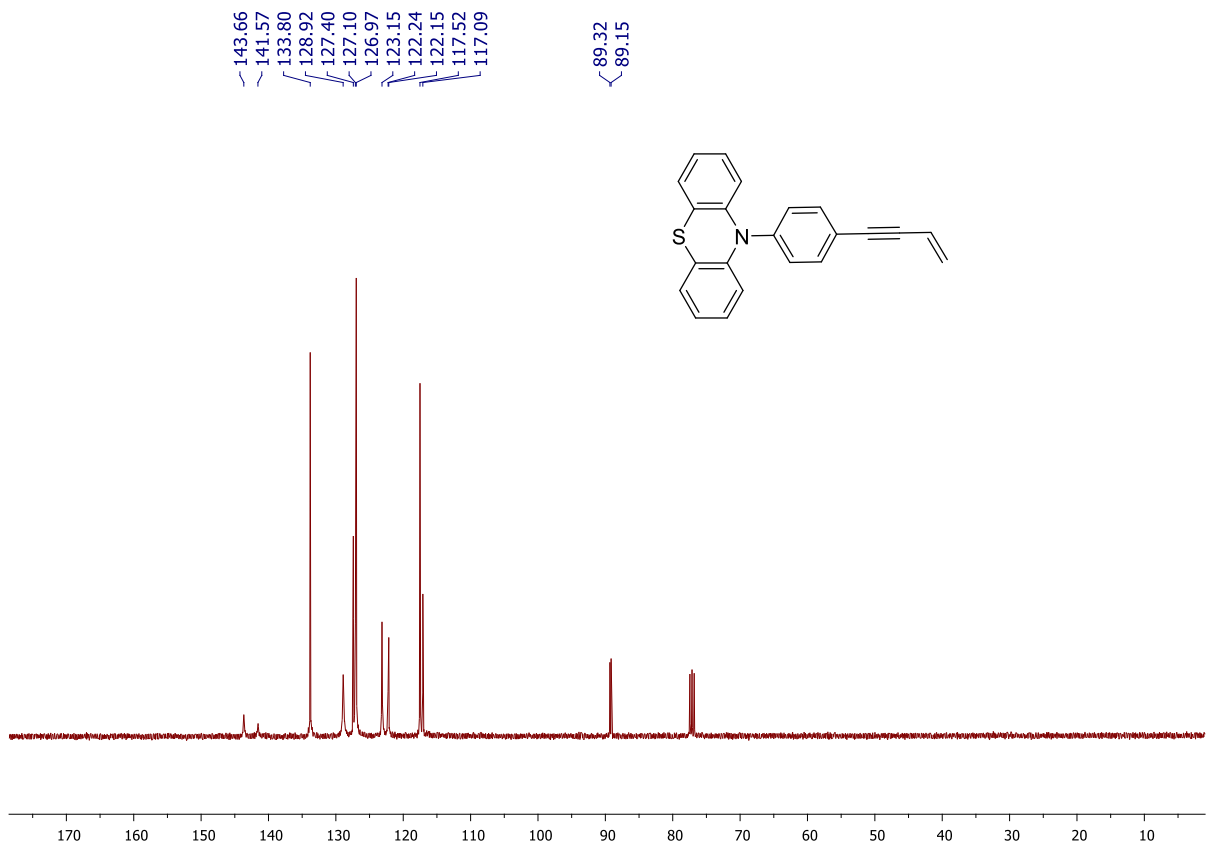

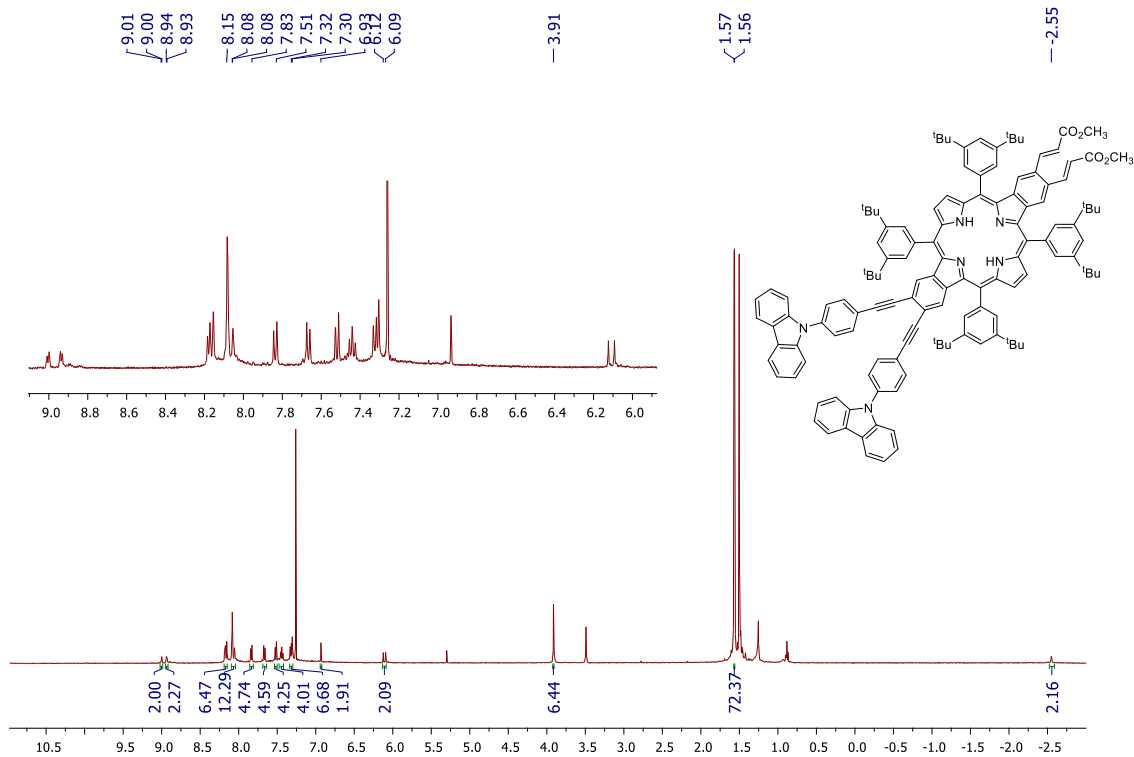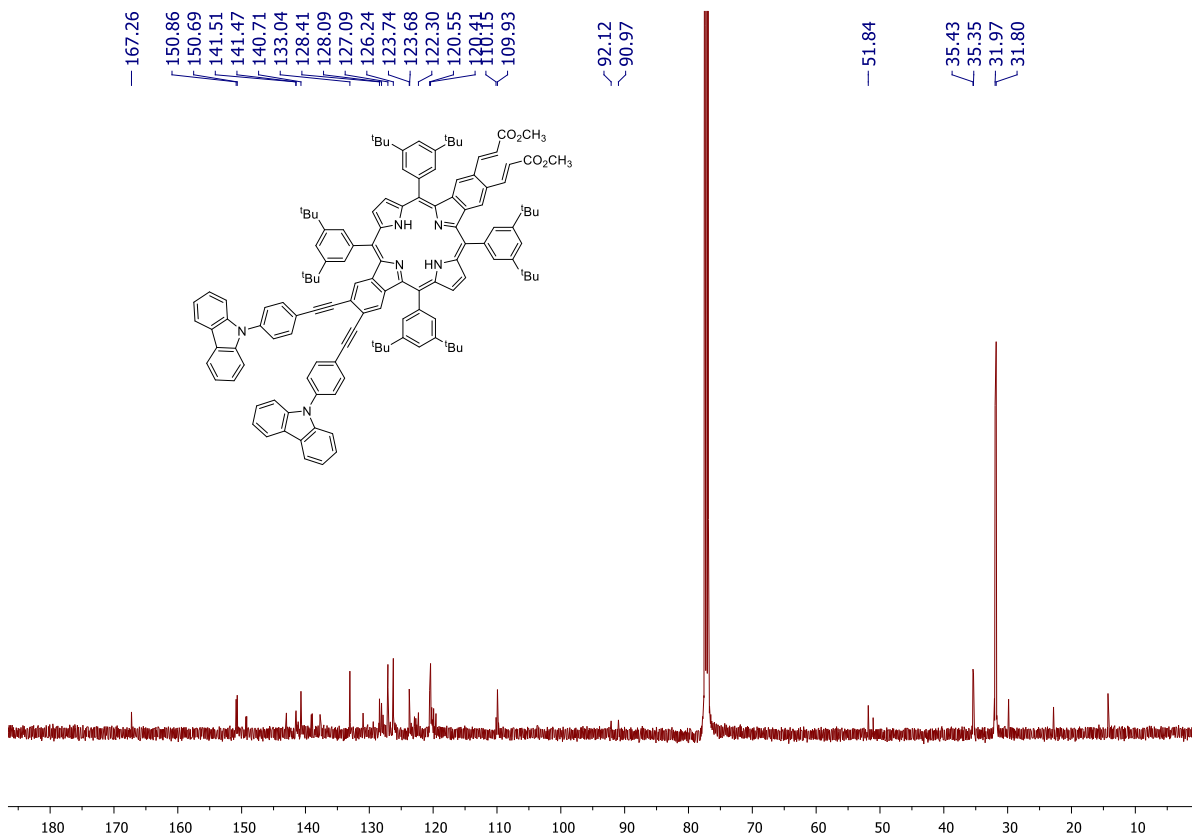

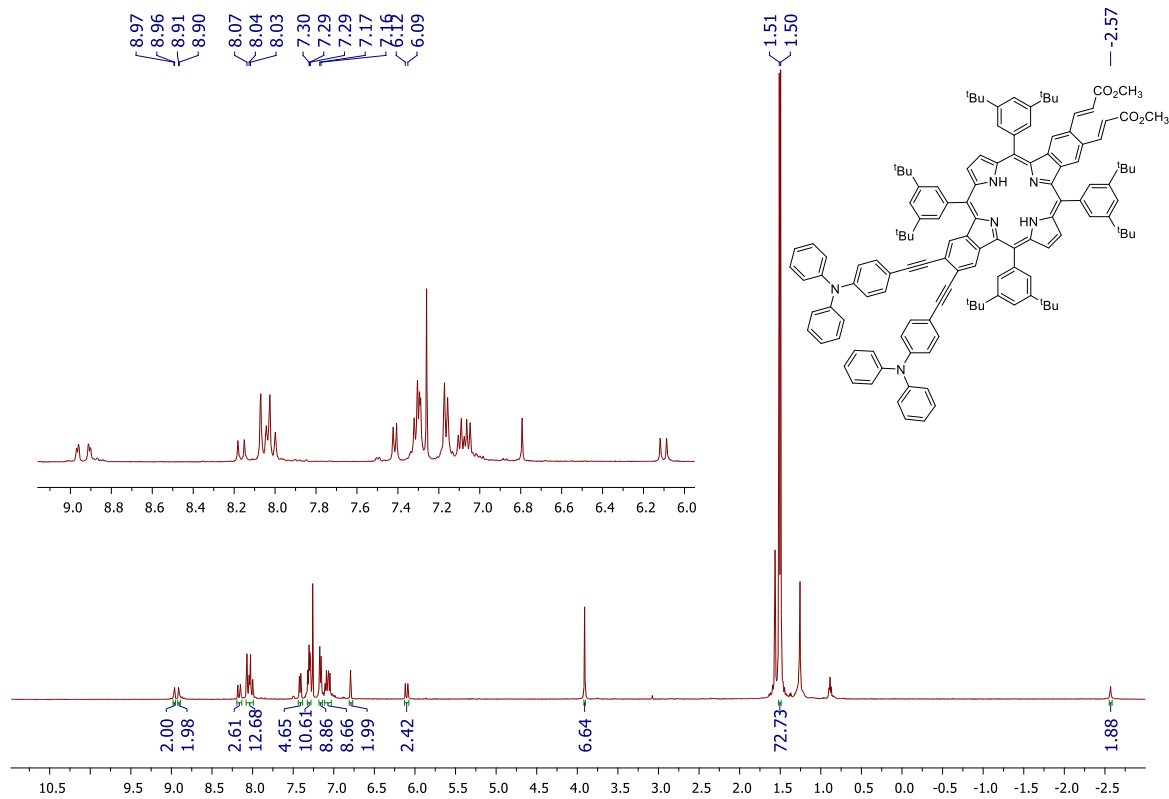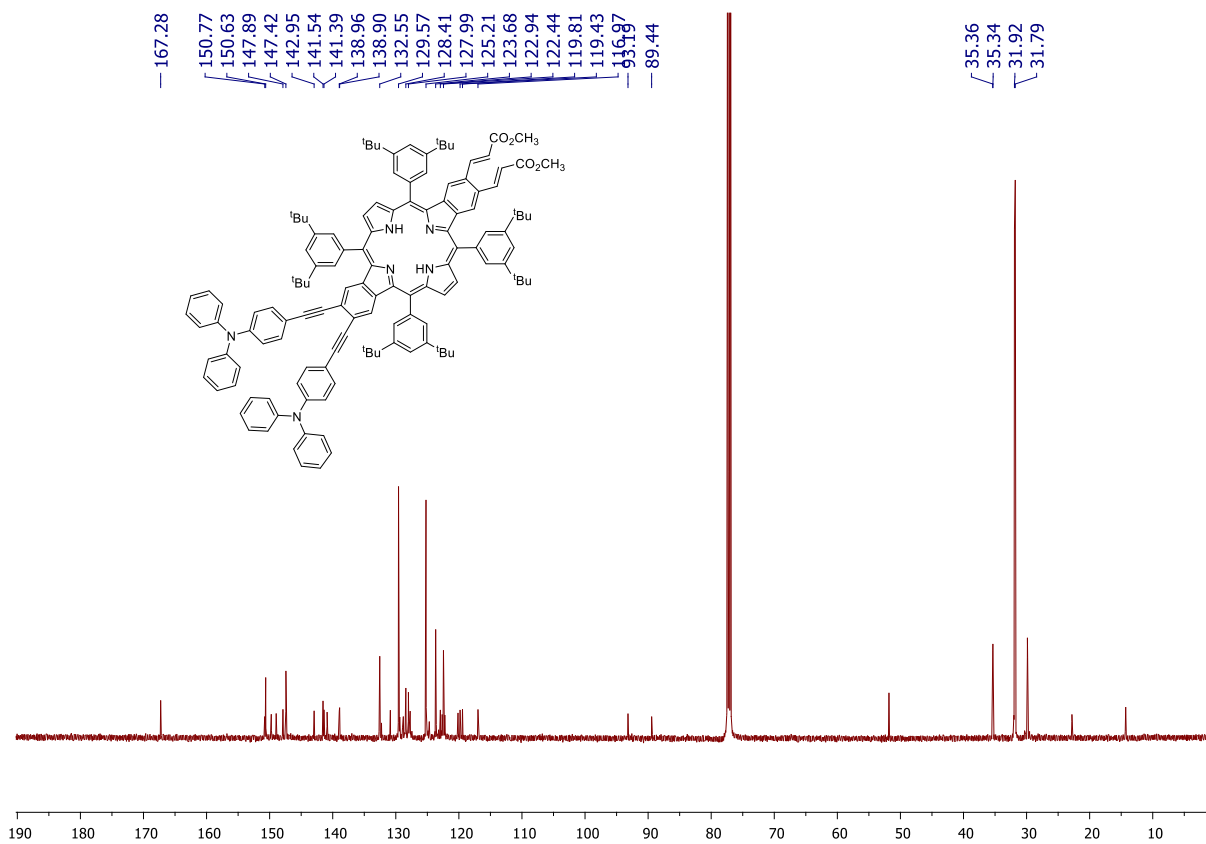

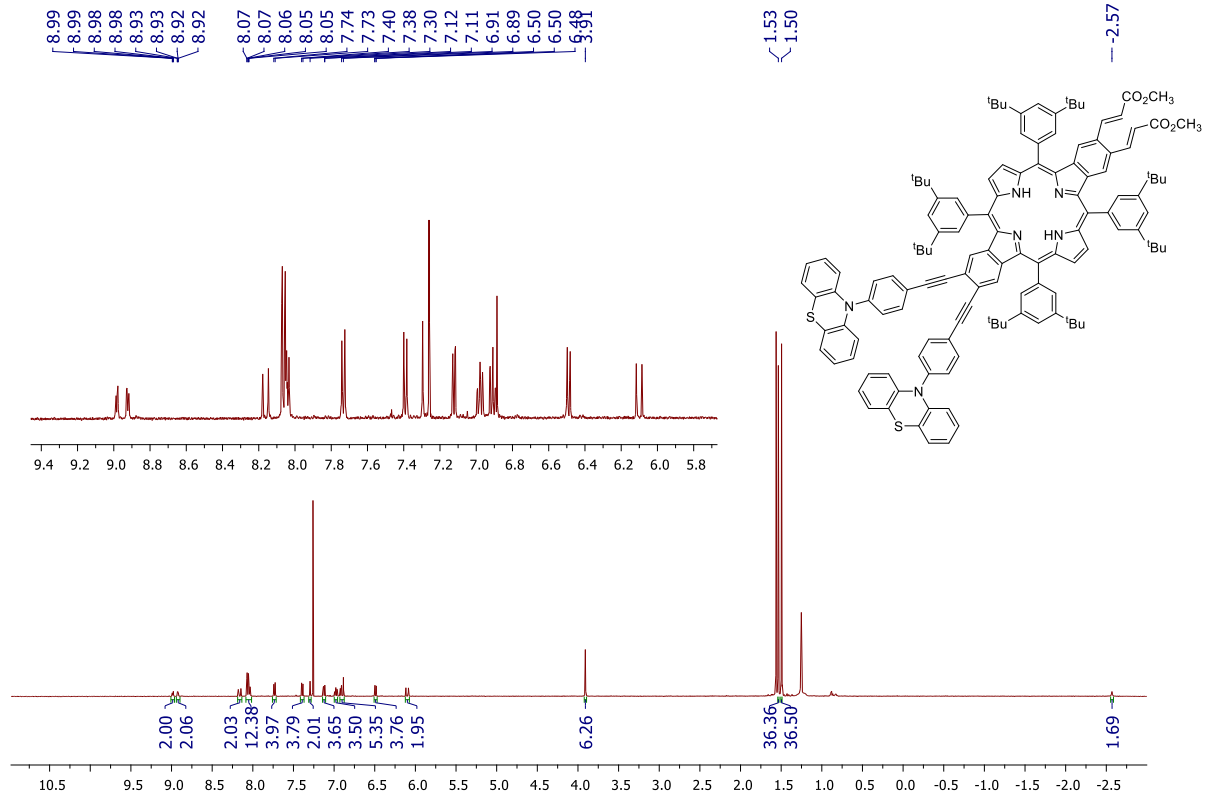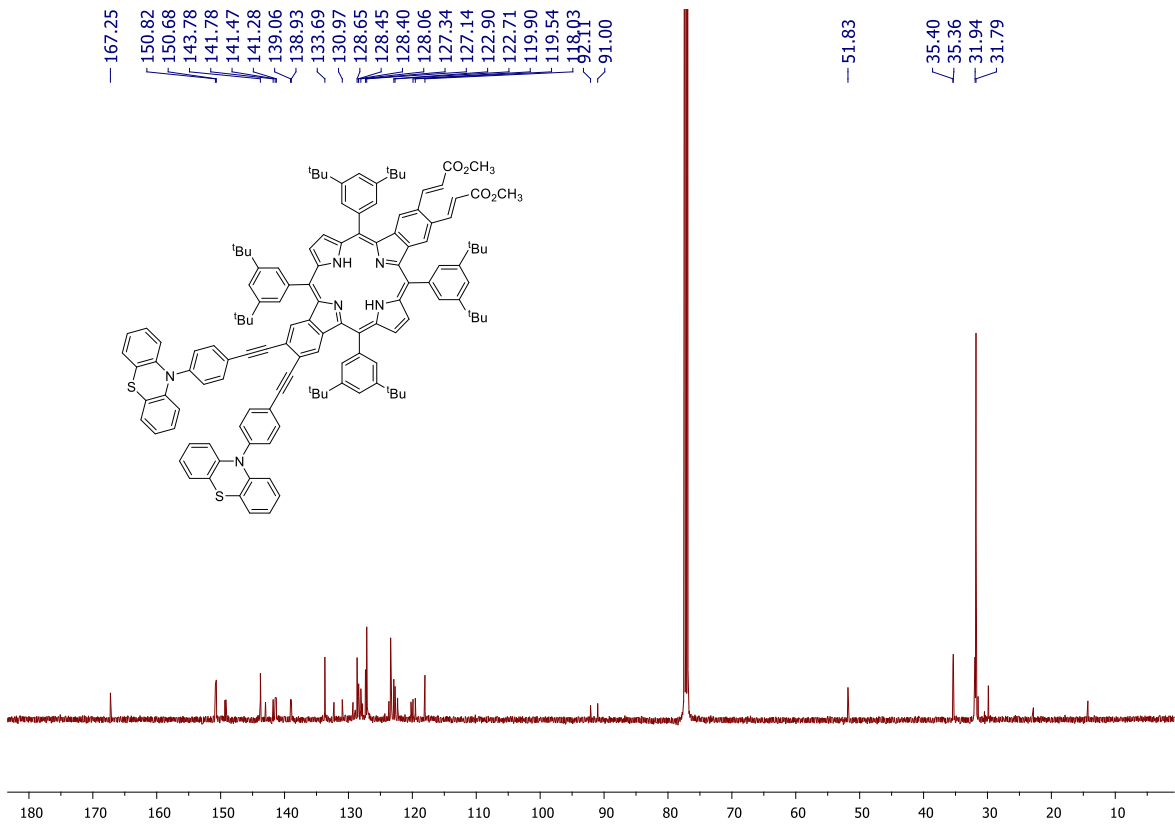





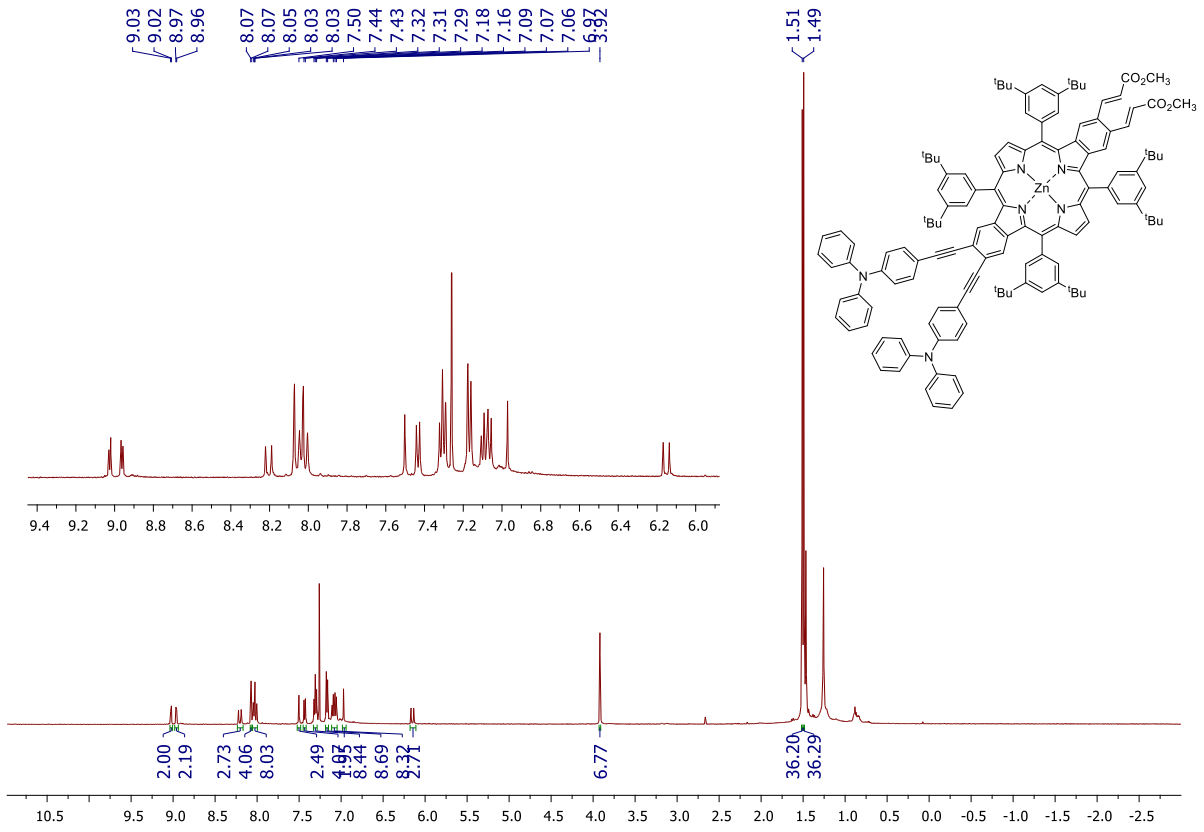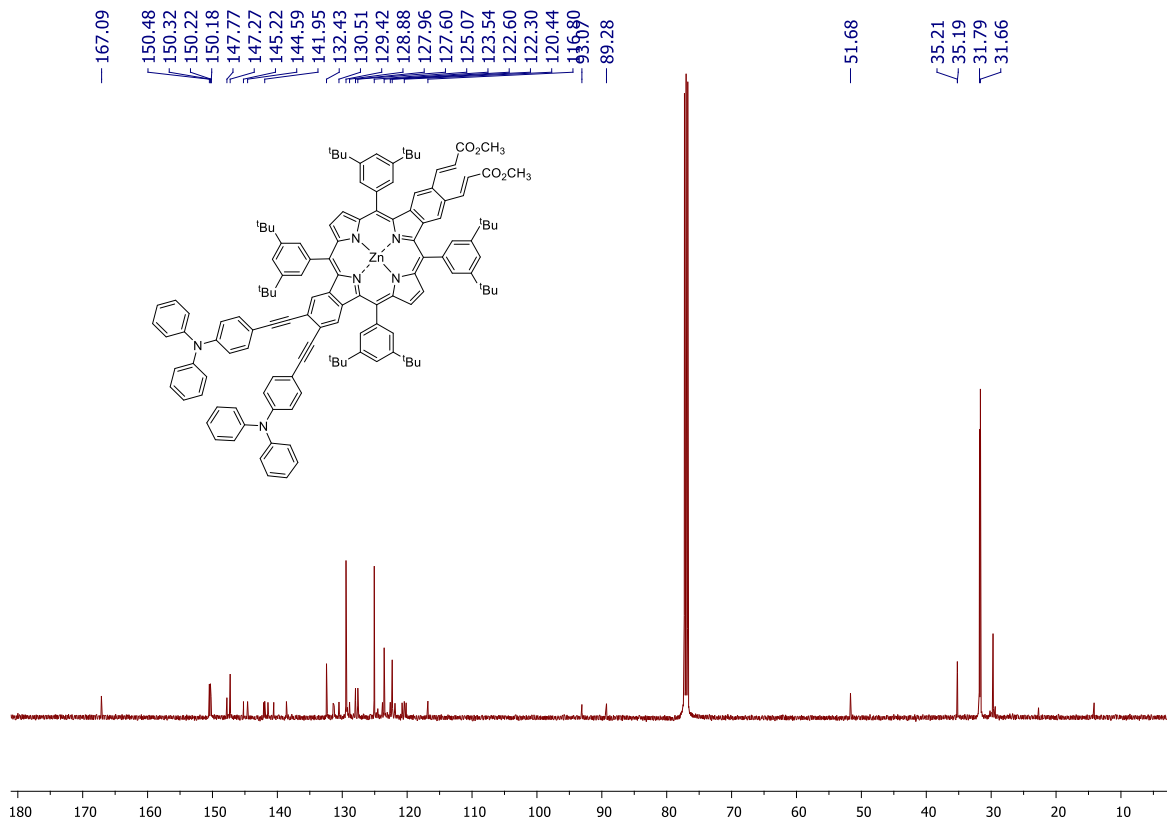



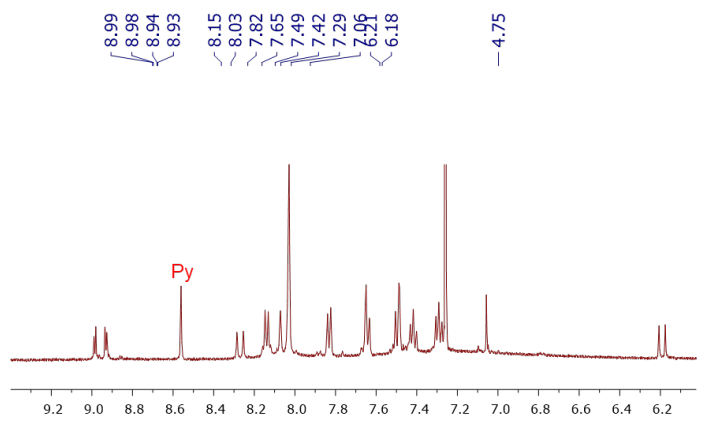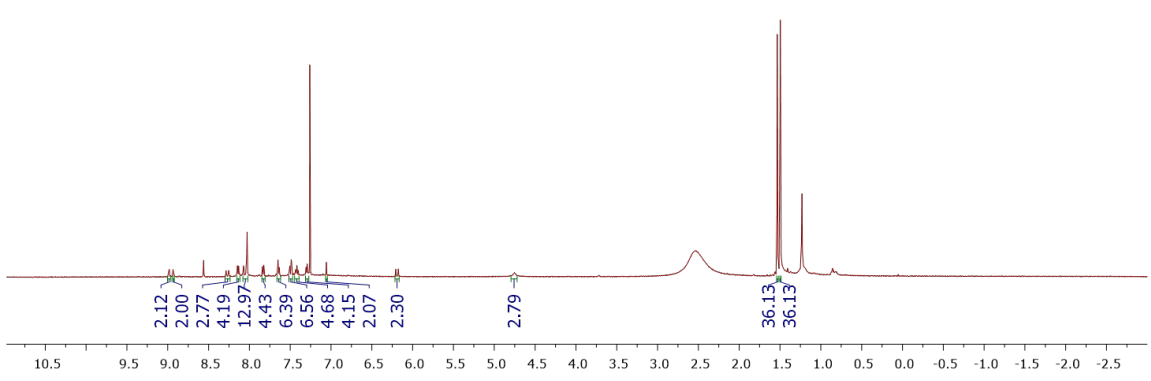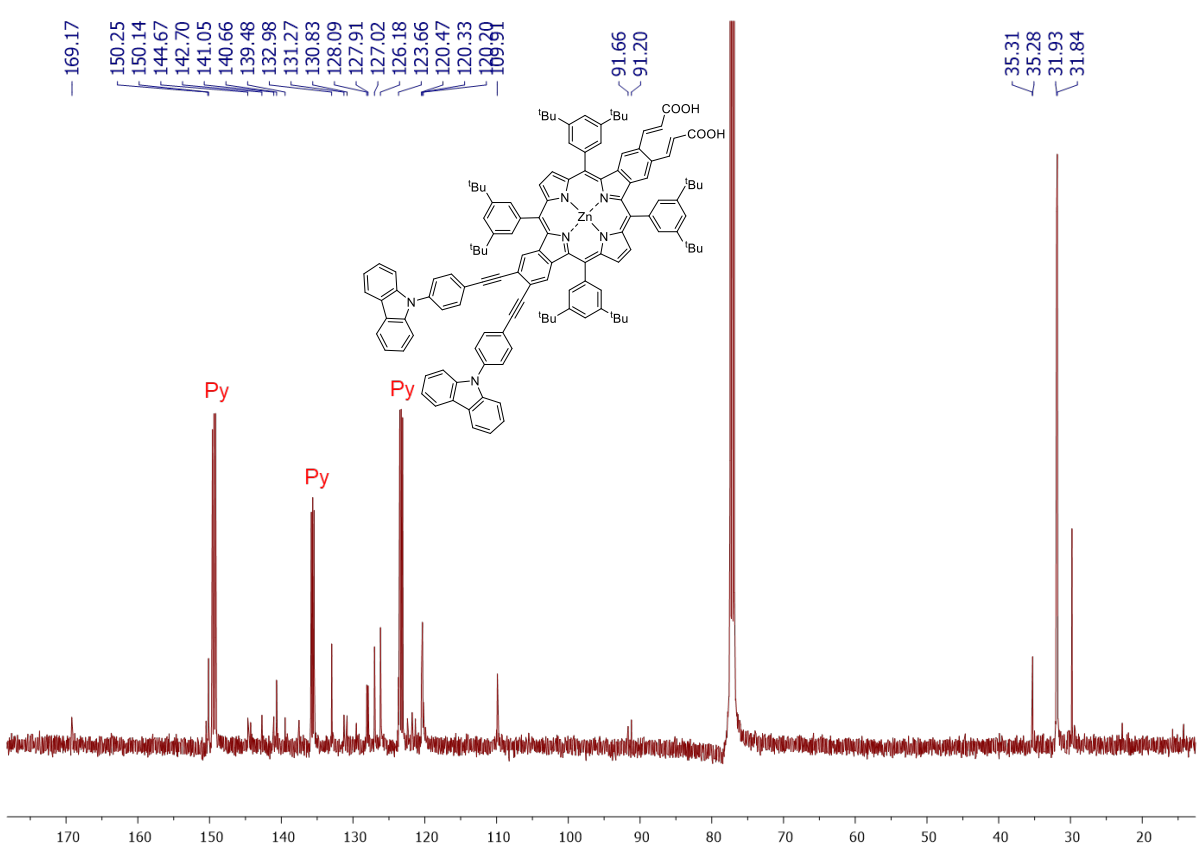

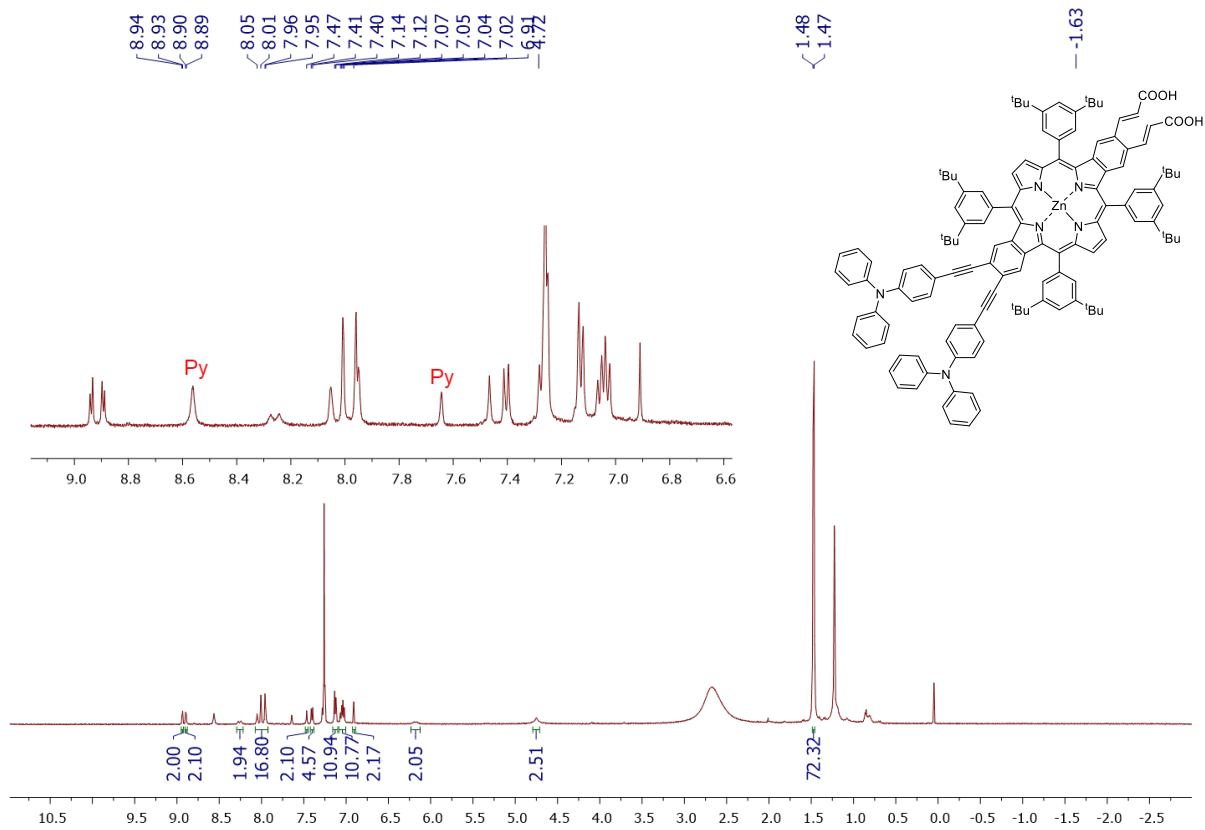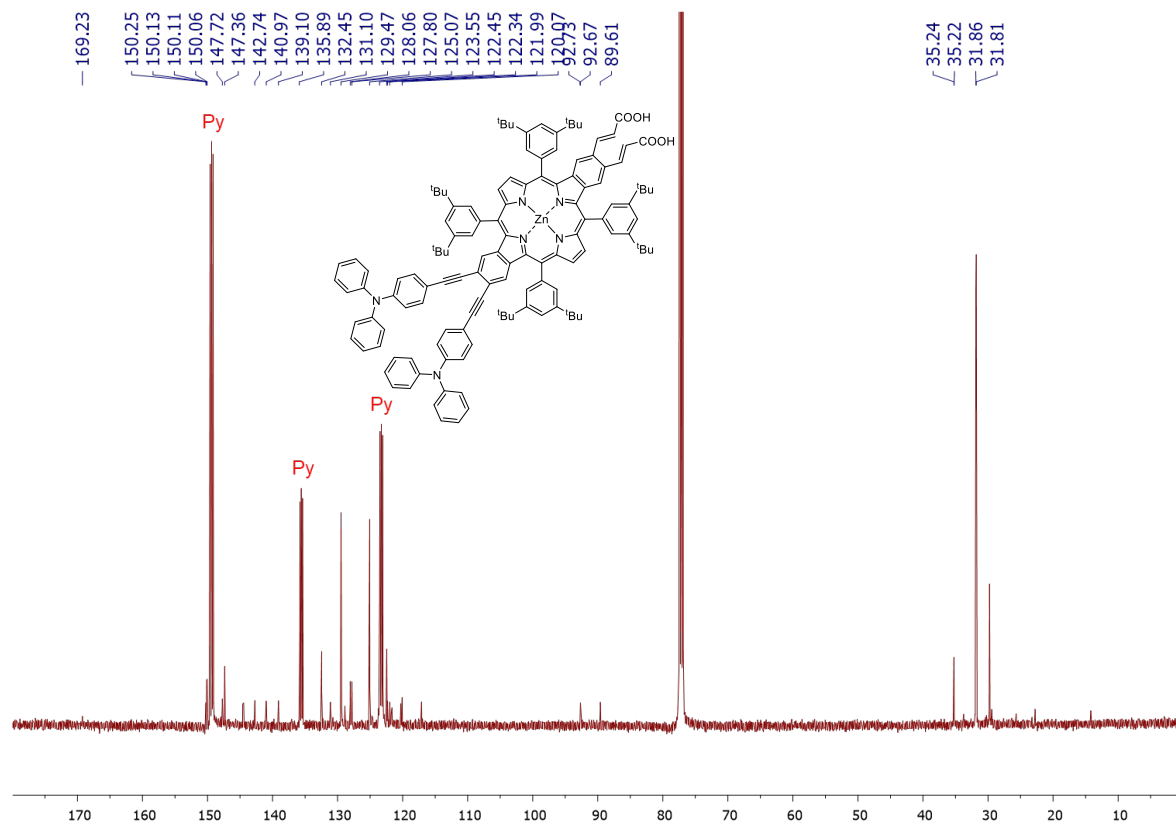

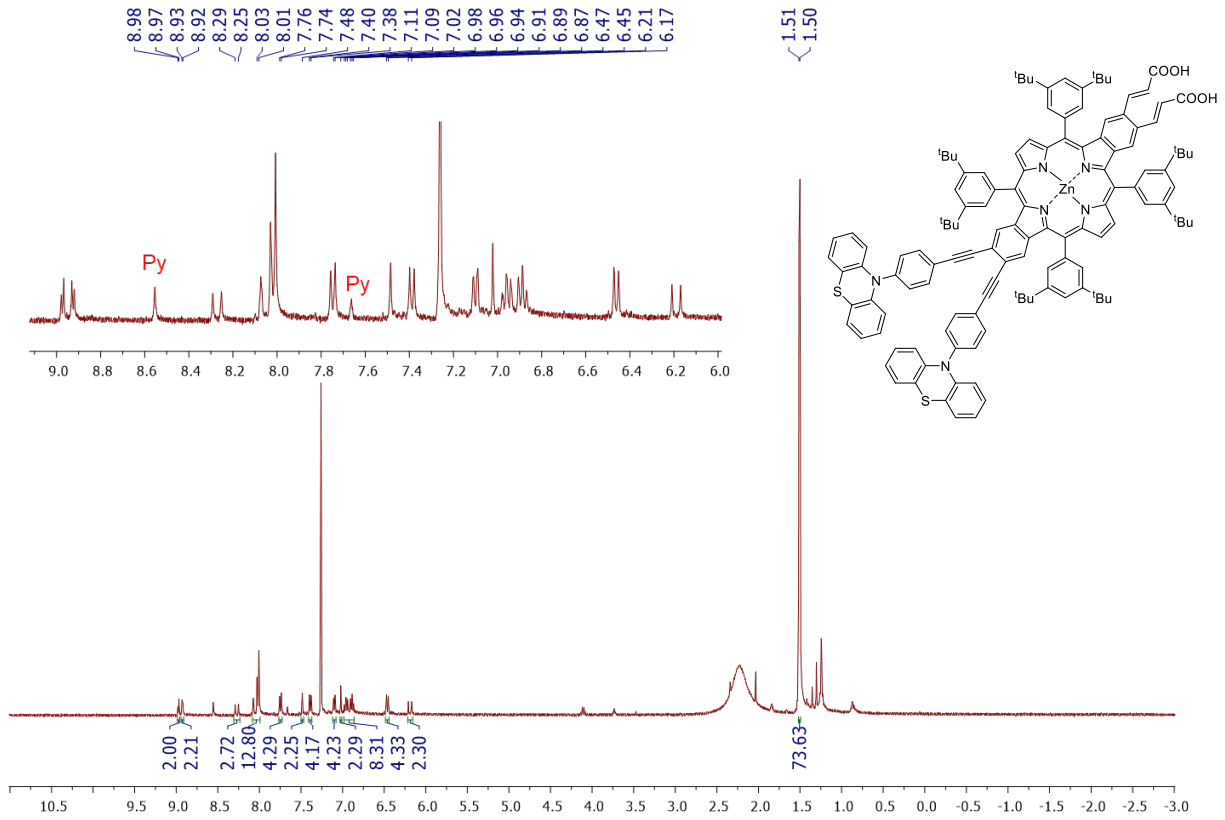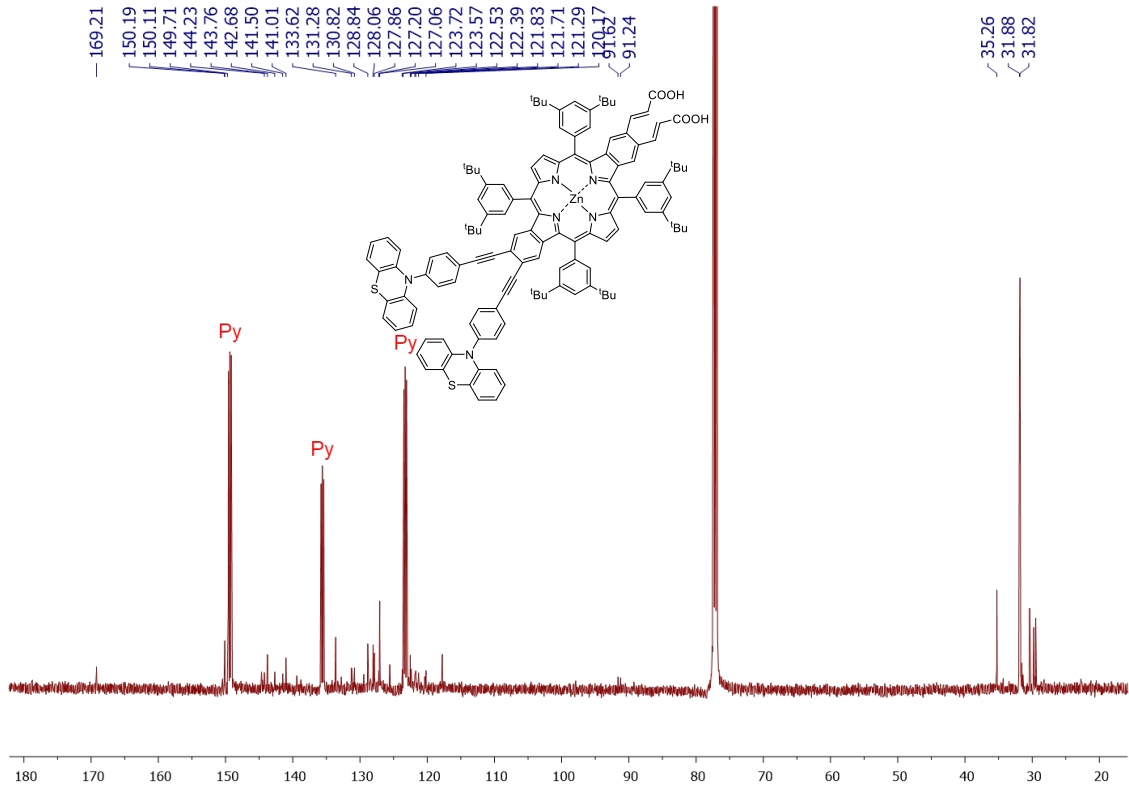

#### 4. IR Spectra

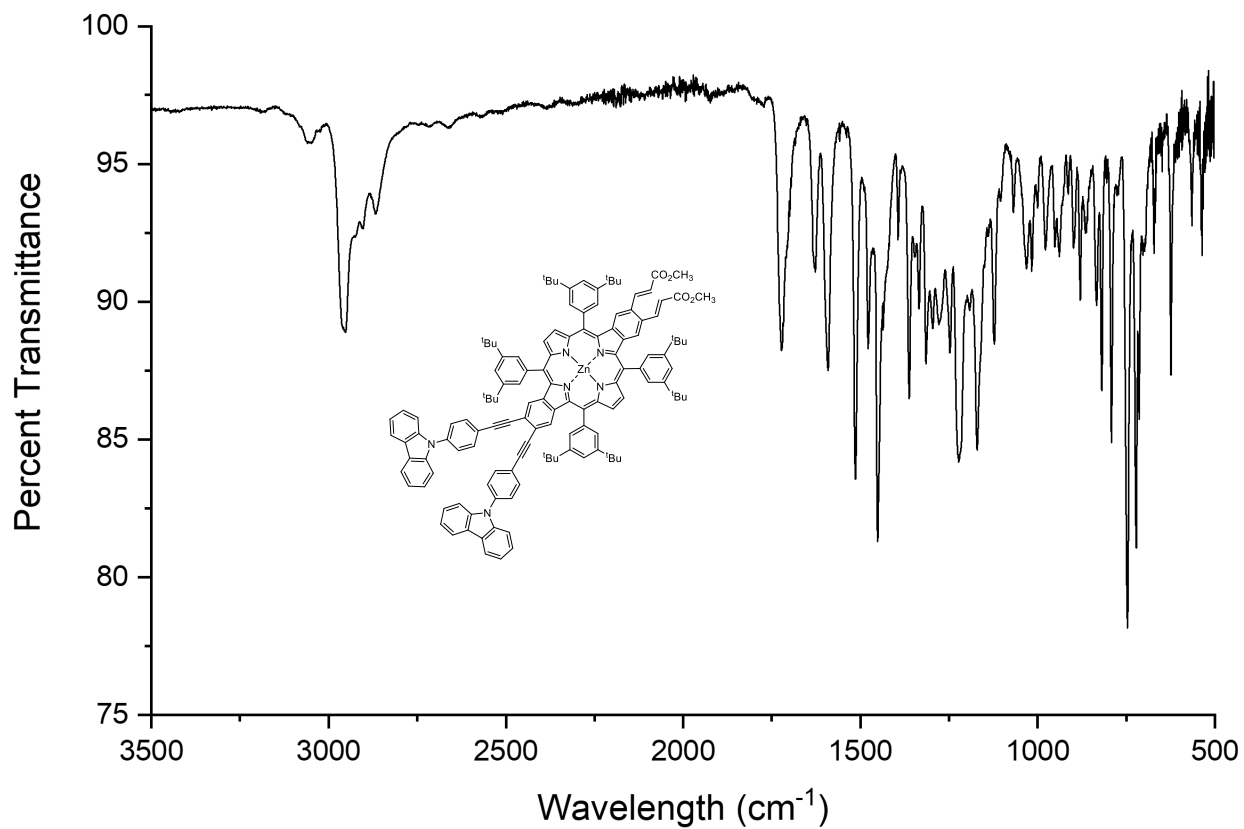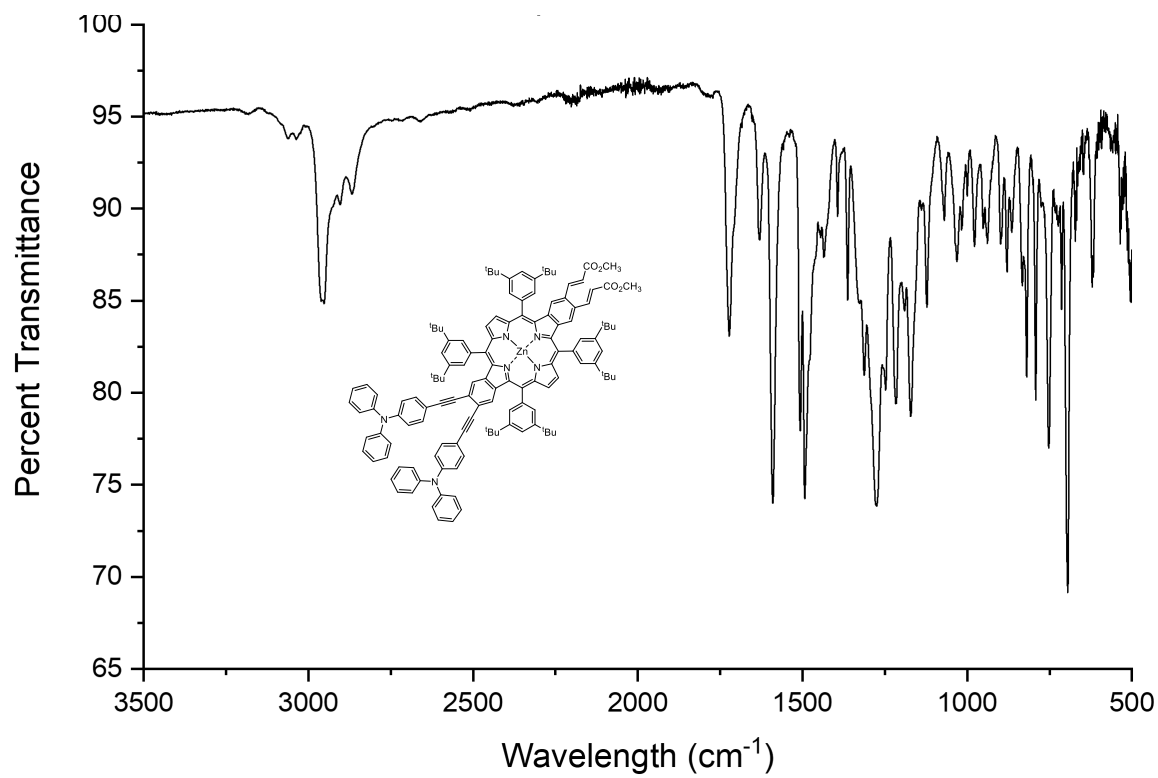

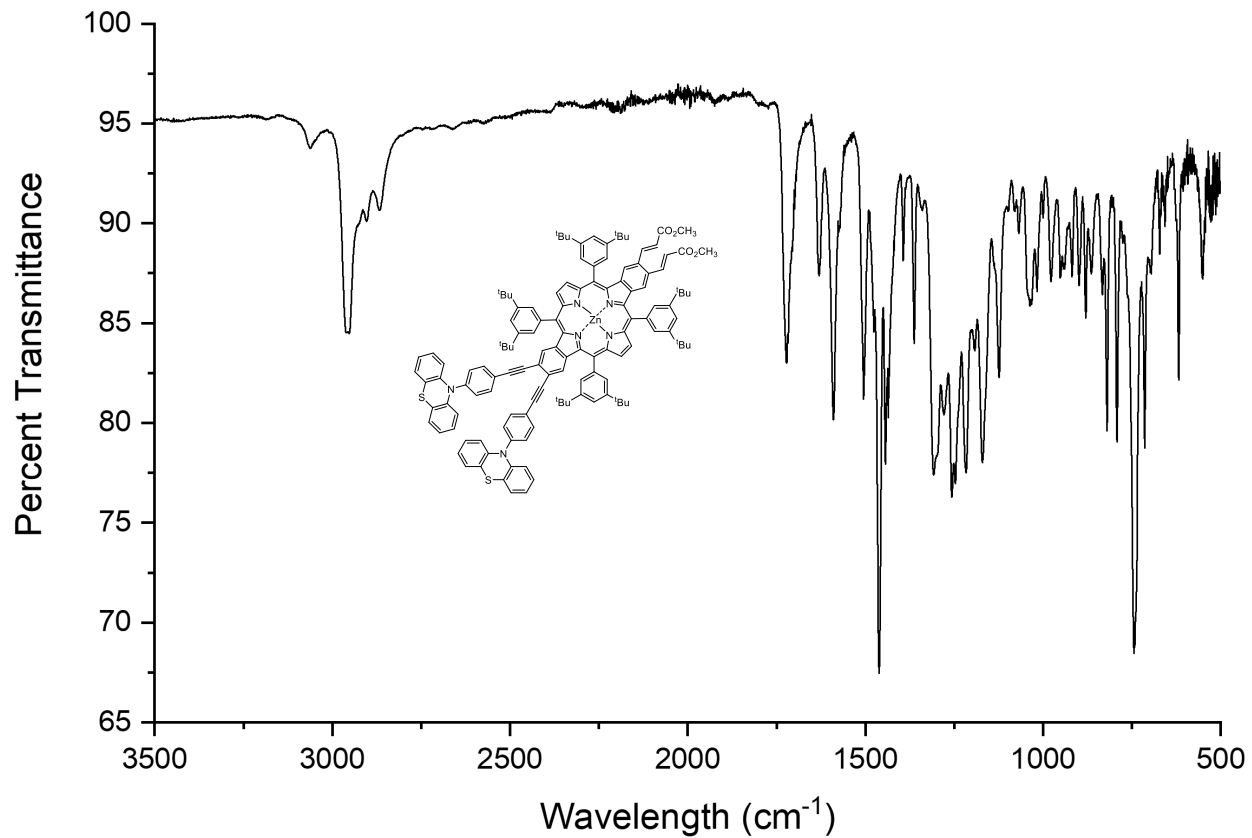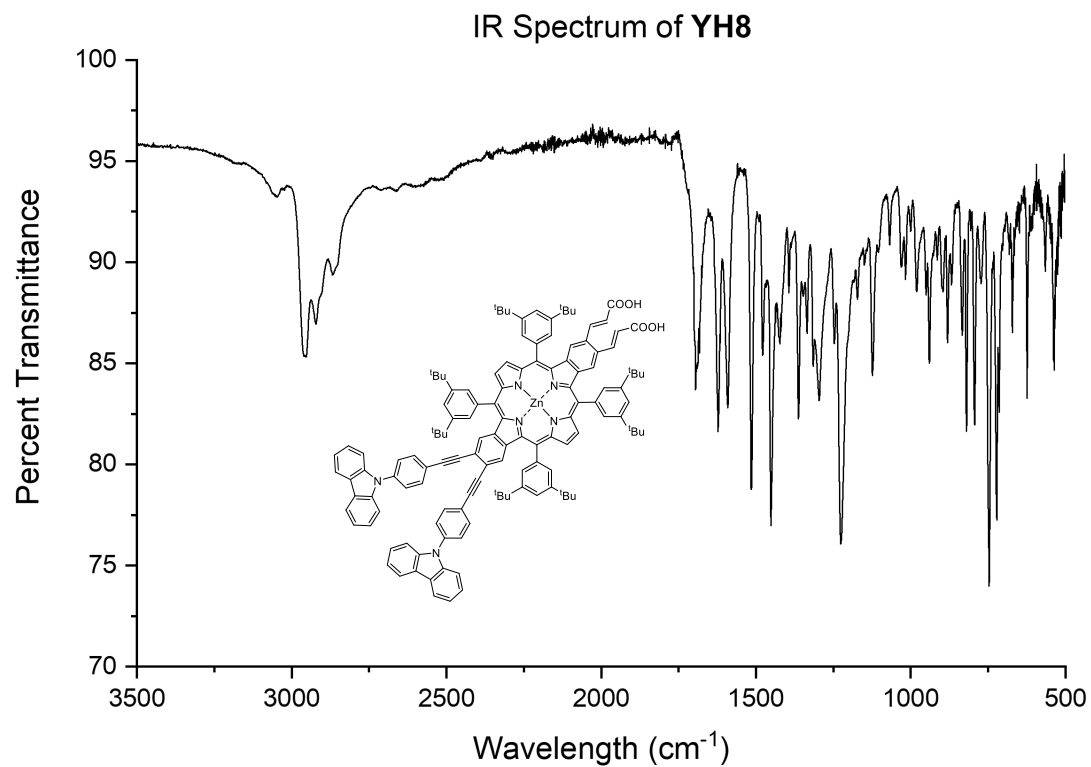



IR Spectrum of YH9

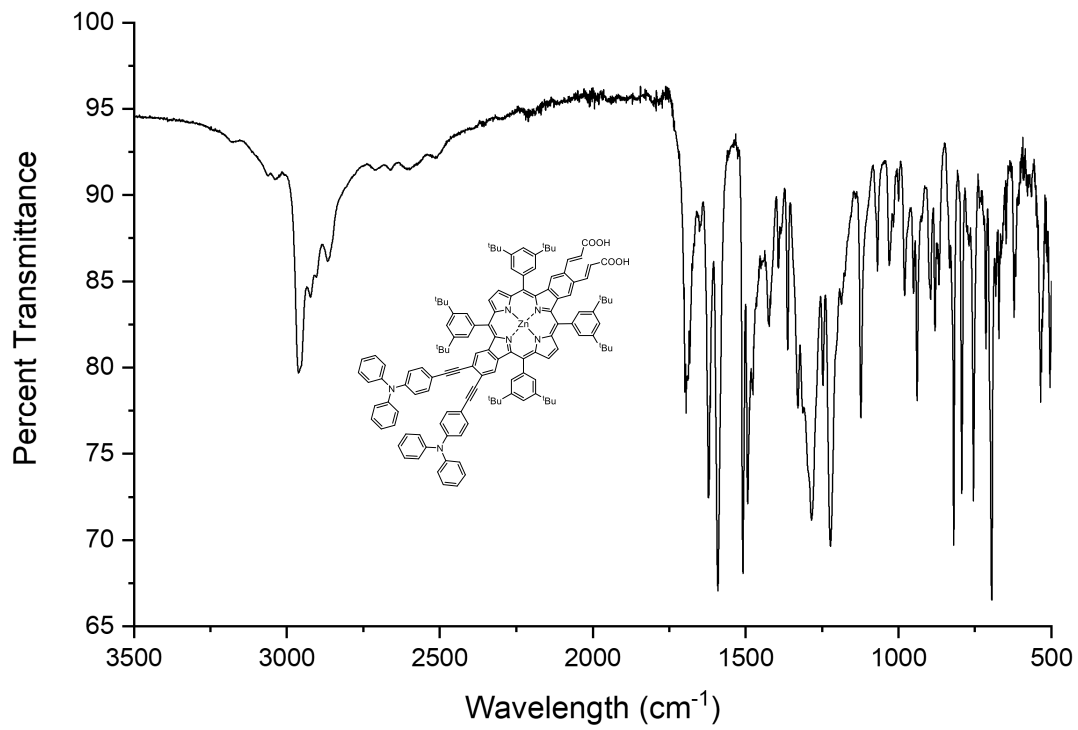

IR Spectrum of YH10

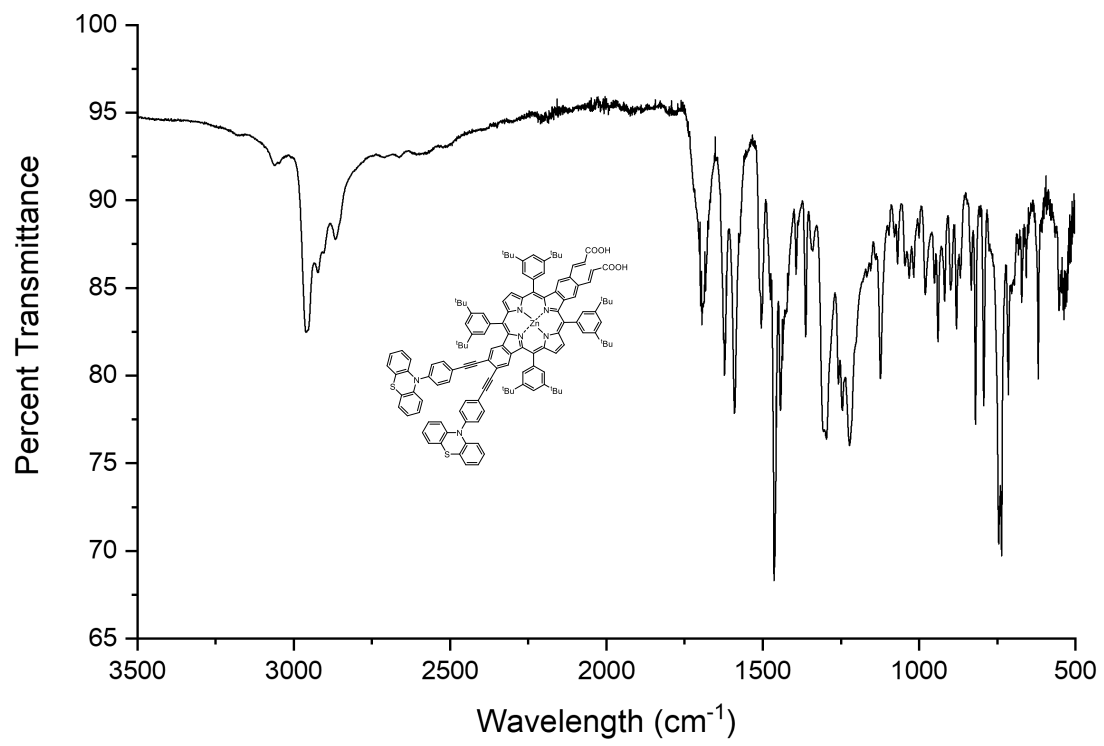

## 5. Atom Coordinates for Optimized (in Vacuo) Structures **YH8** – **YH10**

Atom coordinates for optimized structure **YH8**

|   | X           | Y           | Z           |
|---|-------------|-------------|-------------|
| C | -1.22551100 | -0.75195600 | 0.27496400  |
| C | -1.21628600 | 0.66345800  | 0.28489000  |
| C | 0.18725900  | 1.06346500  | 0.39134800  |
| N | 0.98136700  | -0.05922800 | 0.38190700  |
| C | 0.17368000  | -1.17147900 | 0.36698100  |
| C | 3.78593700  | -4.24933700 | 0.32964800  |
| C | 2.43871700  | -4.24424600 | 0.51223800  |
| C | 1.99933400  | -2.87435900 | 0.40964200  |
| N | 3.09135700  | -2.05389700 | 0.20605800  |
| C | 4.19297200  | -2.88162000 | 0.12439100  |
| C | 0.64632400  | -2.49180900 | 0.45837300  |
| C | 7.39292800  | 0.63281400  | -0.41530200 |
| C | 7.34984400  | -0.77028400 | -0.57846000 |
| C | 5.98251300  | -1.18351300 | -0.26516700 |
| N | 5.21800000  | -0.06716000 | -0.02722800 |
| C | 6.02829500  | 1.04489000  | -0.07682900 |
| C | 5.52082300  | -2.50489600 | -0.14363400 |
| C | 2.48122200  | 4.09728800  | 0.73489000  |
| C | 3.83652400  | 4.09086800  | 0.63195700  |
| C | 4.24079000  | 2.72698200  | 0.39337000  |
| N | 3.12496000  | 1.91318600  | 0.37241800  |
| C | 2.03335400  | 2.73883000  | 0.55456200  |
| C | 0.67457700  | 2.37283300  | 0.53456400  |
| C | 5.57921200  | 2.35265600  | 0.16905800  |
| C | -0.34145000 | -3.60805600 | 0.63981100  |
| C | 6.50694400  | -3.63210700 | -0.25735300 |
| C | 6.56301900  | 3.48946600  | 0.19007200  |

|   |             |             |             |
|---|-------------|-------------|-------------|
| C | -0.30263200 | 3.49902800  | 0.71722700  |
| C | -0.93964100 | -3.81291900 | 1.88853900  |
| C | -1.86945300 | -4.84076900 | 2.08679400  |
| C | -2.16937700 | -5.66482200 | 0.99184700  |
| C | -1.58267200 | -5.49998500 | -0.27124300 |
| C | -0.66202200 | -4.45560800 | -0.42742500 |
| C | -0.60406200 | 4.35883600  | -0.34553100 |
| C | -1.51056800 | 5.41540700  | -0.18703600 |
| C | -2.09949700 | 5.58155400  | 1.07490200  |
| C | -1.81850100 | 4.74483000  | 2.16526000  |
| C | -0.90528200 | 3.70279800  | 1.96384900  |
| C | 6.86406300  | 4.18434000  | -0.99045700 |
| C | 7.74969200  | 5.26546800  | -0.98339100 |
| C | 8.30701900  | 5.64702900  | 0.25046100  |
| C | 8.01534800  | 4.99085000  | 1.45155300  |
| C | 7.13539500  | 3.89761900  | 1.39513000  |
| C | 7.34989700  | -3.93371000 | 0.81846300  |
| C | 8.29339800  | -4.96445500 | 0.73147200  |
| C | 8.35811300  | -5.68585500 | -0.46991300 |
| C | 7.51948600  | -5.42611300 | -1.56385800 |
| C | 6.58768000  | -4.38727700 | -1.43325000 |
| C | 8.59275400  | 1.32302900  | -0.63593300 |
| C | 9.73559900  | 0.64195800  | -1.06141300 |
| C | 9.68172700  | -0.77237700 | -1.27100800 |
| C | 8.48212200  | -1.45390300 | -1.02747200 |
| C | -2.41368000 | 1.37582800  | 0.15542300  |
| C | -3.62881700 | 0.69049600  | 0.03945600  |
| C | -3.63980300 | -0.74306200 | 0.04413900  |
| C | -2.43375800 | -1.44635400 | 0.14699700  |
| C | -4.86426800 | -1.45979900 | -0.04191500 |

|   |             |             |             |
|---|-------------|-------------|-------------|
| C | -5.90545600 | -2.08795800 | -0.09185700 |
| C | -7.13321800 | -2.80453300 | -0.14076400 |
| C | -8.35724700 | -2.15158700 | 0.11201300  |
| C | -7.15783000 | -4.18250100 | -0.43701200 |
| C | -8.36020600 | -4.87685300 | -0.49084300 |
| C | -9.55734300 | -2.85078200 | 0.07666400  |
| C | -9.57054700 | -4.21899800 | -0.22992300 |
| C | -4.83717100 | 1.42625700  | -0.09662100 |
| C | -5.85995100 | 2.07393800  | -0.22124400 |
| C | -7.06261400 | 2.81849600  | -0.36995500 |
| C | -7.09263900 | 4.20369000  | -0.10978000 |
| C | -8.25486300 | 2.18812000  | -0.78167100 |
| C | -9.42954600 | 2.91520700  | -0.92971600 |
| C | -8.27180300 | 4.92668500  | -0.24119200 |
| C | -9.45059600 | 4.28991700  | -0.65446400 |
| C | 7.64745100  | -6.27208400 | -2.84585500 |
| C | 6.65440300  | -5.83072500 | -3.93762400 |
| C | 7.36581700  | -7.75639600 | -2.51137400 |
| C | 9.07982500  | -6.13936800 | -3.41534400 |
| C | 9.25143700  | -5.31305700 | 1.88681800  |
| C | 9.04695000  | -6.78937900 | 2.30175600  |
| C | 10.71226300 | -5.10924100 | 1.41871600  |
| C | 9.01702100  | -4.42975300 | 3.12690600  |
| C | -1.86733900 | 6.38224100  | -1.33318300 |
| C | -3.39317400 | 6.34652200  | -1.58711000 |
| C | -1.44712200 | 7.81869900  | -0.94126300 |
| C | -1.15640700 | 6.01610200  | -2.64995600 |
| C | -2.51396200 | 4.99084100  | 3.51820400  |
| C | -2.09796200 | 3.96010000  | 4.58454800  |
| C | -4.04714600 | 4.89673400  | 3.32995100  |

|    |              |             |             |
|----|--------------|-------------|-------------|
| C  | -2.14549100  | 6.39965400  | 4.03968400  |
| C  | 8.12981400   | 6.03817200  | -2.26139600 |
| C  | 7.43024200   | 5.47756000  | -3.51393300 |
| C  | 7.72452400   | 7.52366300  | -2.10933700 |
| C  | 9.65844800   | 5.94391500  | -2.48142400 |
| C  | 8.57110900   | 5.47926000  | 2.80438600  |
| C  | 8.92120200   | 4.28992400  | 3.72770300  |
| C  | 9.84307300   | 6.33508200  | 2.62689500  |
| C  | 7.48660900   | 6.34625400  | 3.48970400  |
| C  | -1.96019700  | -6.45240400 | -1.42281600 |
| C  | -3.48171700  | -6.36352500 | -1.69063800 |
| C  | -1.59340300  | -7.90354900 | -1.03167400 |
| C  | -1.22481100  | -6.10800500 | -2.73195700 |
| C  | -2.56661400  | -5.08127800 | 3.43984300  |
| C  | -2.23522000  | -6.50424500 | 3.94748400  |
| C  | -4.09700800  | -4.94293400 | 3.25631600  |
| C  | -2.11907900  | -4.07249500 | 4.51441500  |
| Zn | 3.10414500   | -0.06726400 | 0.23352900  |
| C  | 10.92024600  | 1.41812800  | -1.46863300 |
| C  | 11.58451600  | 2.39707600  | -0.82184900 |
| C  | 11.39648700  | 2.79424400  | 0.58700500  |
| O  | 12.24888400  | 3.80773200  | 0.91169200  |
| O  | 10.64182000  | 2.30377100  | 1.40414100  |
| C  | 10.80566700  | -1.59987600 | -1.70185100 |
| C  | 12.13062700  | -1.35001600 | -1.65806900 |
| C  | 13.07606500  | -2.37103300 | -2.14516500 |
| O  | 14.36568700  | -1.96233500 | -2.00153500 |
| O  | 12.79150000  | -3.45406500 | -2.62323800 |
| N  | -10.65250200 | 5.02912400  | -0.79273400 |
| C  | -11.87840400 | 4.72161300  | -0.18726200 |

|   |              |             |             |
|---|--------------|-------------|-------------|
| C | -10.32964100 | 8.00793700  | -3.02968800 |
| C | -9.89347300  | 6.86830600  | -2.35747400 |
| C | -12.56954900 | 7.78697300  | -2.11722100 |
| C | -10.81586800 | 6.19634400  | -1.55054500 |
| C | -12.15778000 | 6.63874700  | -1.43109000 |
| C | -12.20135500 | 3.67971300  | 0.68650200  |
| C | -14.13993700 | 5.61421600  | -0.06347800 |
| C | -14.47135900 | 4.57027700  | 0.79489900  |
| N | -10.79594500 | -4.93081400 | -0.27398200 |
| C | -11.08681700 | -6.10692800 | 0.42999000  |
| C | -11.92255000 | -4.57971400 | -1.02983000 |
| C | -10.29722900 | -6.81684400 | 1.33875700  |
| C | -12.14948300 | -8.38237800 | 1.61532100  |
| C | -14.35758400 | -4.34096500 | -2.34342700 |
| C | -12.83438000 | 5.70009600  | -0.56049100 |
| C | -13.50761200 | 3.61784900  | 1.16681300  |
| C | -10.84563700 | -7.95738400 | 1.92128800  |
| C | -12.93667500 | -7.66247700 | 0.72168200  |
| C | -12.10151900 | -3.51330500 | -1.91522000 |
| C | -13.33044800 | -3.40756900 | -2.56284700 |
| C | -12.41048600 | -6.51219700 | 0.12268400  |
| C | -12.94256500 | -5.53957200 | -0.80897300 |
| C | -14.16806000 | -5.40947300 | -1.47238200 |
| C | -11.65163000 | 8.46882300  | -2.91032000 |
| H | 6.78158300   | -6.45812600 | -4.82555700 |
| H | 6.81850900   | -4.79210800 | -4.24250700 |
| H | 5.61472600   | -5.93064400 | -3.60928000 |
| H | 7.45959700   | -8.37341800 | -3.41202400 |
| H | 6.35262500   | -7.88435500 | -2.11622500 |
| H | 8.06629500   | -8.14642800 | -1.76722700 |

|   |             |             |             |
|---|-------------|-------------|-------------|
| H | 9.18410100  | -6.74318500 | -4.32375800 |
| H | 9.83872300  | -6.47714900 | -2.70413000 |
| H | 9.30794200  | -5.10009800 | -3.67281800 |
| H | 9.24199800  | -7.47717700 | 1.47379000  |
| H | 8.02170200  | -6.96213300 | 2.64532700  |
| H | 9.72774900  | -7.05219900 | 3.11906800  |
| H | 10.96052400 | -5.74475300 | 0.56377400  |
| H | 11.40821500 | -5.35347200 | 2.22919500  |
| H | 10.88770400 | -4.07017700 | 1.12232600  |
| H | 9.18419800  | -3.36979800 | 2.91086900  |
| H | 9.71455000  | -4.71785500 | 3.91981400  |
| H | 8.00240900  | -4.54273600 | 3.52285900  |
| H | -3.65744200 | 7.02026900  | -2.40979800 |
| H | -3.96073600 | 6.66320600  | -0.70692200 |
| H | -3.72342200 | 5.33762600  | -1.85457800 |
| H | -1.70071500 | 8.52236300  | -1.74207600 |
| H | -0.36761400 | 7.87710500  | -0.76787000 |
| H | -1.95011800 | 8.15548400  | -0.03000200 |
| H | -1.44394400 | 6.72561200  | -3.43243400 |
| H | -1.43009700 | 5.01425400  | -2.99617900 |
| H | -0.06688200 | 6.05882500  | -2.55191500 |
| H | -2.35614000 | 2.93887500  | 4.28677600  |
| H | -2.61890300 | 4.17191400  | 5.52375200  |
| H | -1.02296500 | 3.99610000  | 4.78893400  |
| H | -4.41828900 | 5.65469900  | 2.63343500  |
| H | -4.55889700 | 5.04842400  | 4.28680100  |
| H | -4.33543300 | 3.91489300  | 2.94094300  |
| H | -2.44916100 | 7.18518300  | 3.34145200  |
| H | -1.06525300 | 6.48955100  | 4.19415300  |
| H | -2.64228600 | 6.59445200  | 4.99681600  |

|   |             |             |             |
|---|-------------|-------------|-------------|
| H | 7.73074400  | 6.05613300  | -4.39337400 |
| H | 6.34005700  | 5.54002600  | -3.43539400 |
| H | 7.70028600  | 4.43275200  | -3.69852200 |
| H | 7.99427700  | 8.08634100  | -3.01010400 |
| H | 8.22381400  | 7.99822100  | -1.25966200 |
| H | 6.64426700  | 7.62168800  | -1.95959600 |
| H | 9.94658600  | 6.48265500  | -3.39119500 |
| H | 9.97478100  | 4.90112000  | -2.58803000 |
| H | 10.21851400 | 6.37610600  | -1.64722900 |
| H | 9.61839100  | 3.60034900  | 3.24381600  |
| H | 8.03485800  | 3.71849300  | 4.01773400  |
| H | 9.37573300  | 4.66213500  | 4.65245200  |
| H | 9.64035200  | 7.28105100  | 2.11543000  |
| H | 10.60918200 | 5.80312000  | 2.05290000  |
| H | 10.26196800 | 6.58491100  | 3.60711200  |
| H | 7.22481200  | 7.21250800  | 2.87291400  |
| H | 7.84280000  | 6.71366400  | 4.45920600  |
| H | 6.57271100  | 5.76916100  | 3.66235700  |
| H | -3.76427900 | -7.03338500 | -2.51039600 |
| H | -3.76967200 | -5.34461200 | -1.97019000 |
| H | -4.06690600 | -6.65086500 | -0.81176200 |
| H | -1.86204300 | -8.59532600 | -1.83785900 |
| H | -2.11687600 | -8.22699300 | -0.12725500 |
| H | -0.51840000 | -7.99927800 | -0.84722800 |
| H | -1.52351800 | -6.80973800 | -3.51725600 |
| H | -0.13815700 | -6.18112500 | -2.62083400 |
| H | -1.46618000 | -5.09925900 | -3.08202900 |
| H | -2.56393800 | -7.27545600 | 3.24467100  |
| H | -2.73308400 | -6.69301900 | 4.90526000  |
| H | -1.15725000 | -6.62575100 | 4.09634300  |



|   |              |             |             |
|---|--------------|-------------|-------------|
| H | -4.49073500  | -5.67994900 | 2.55008800  |
| H | -4.35956500  | -3.94907500 | 2.88004100  |
| H | -4.61033100  | -5.09270500 | 4.21270000  |
| H | -2.35251300  | -3.04201900 | 4.22835800  |
| H | -1.04437000  | -4.13809600 | 4.71309900  |
| H | -2.64112800  | -4.28033000 | 5.45388600  |
| H | -9.63065900  | 8.54761500  | -3.66185700 |
| H | -8.87447200  | 6.51370600  | -2.46466600 |
| H | -13.59444400 | 8.13733400  | -2.03476000 |
| H | -11.95862200 | 9.36155300  | -3.44634700 |
| H | -14.88265100 | 6.35661700  | -0.34135100 |
| H | -15.48110700 | 4.49181300  | 1.18573300  |
| H | -13.78286400 | 2.81626100  | 1.84584000  |
| H | -11.46135000 | 2.94702700  | 0.98826100  |
| H | -8.29159300  | 5.98672400  | -0.01176500 |
| H | -10.33543300 | 2.42698400  | -1.27292000 |
| H | -8.24080100  | 1.12645100  | -1.00483300 |
| H | -6.18343200  | 4.69972100  | 0.21305300  |
| H | -10.49109000 | -2.34621500 | 0.30098600  |
| H | -8.35027500  | -1.09548700 | 0.36060800  |
| H | -8.37145400  | -5.93060700 | -0.74801300 |
| H | -6.22414200  | -4.69624800 | -0.64031300 |
| H | -11.31056500 | -2.79502000 | -2.09952100 |
| H | -13.49367500 | -2.58599400 | -3.25405800 |
| H | -15.30423700 | -4.22818700 | -2.86265600 |
| H | -14.95869200 | -6.13685400 | -1.31191500 |
| H | -13.94874600 | -7.98516300 | 0.49463600  |
| H | -12.54586600 | -9.27702500 | 2.08544300  |
| H | -10.25053300 | -8.52634300 | 2.62954500  |
| H | -9.29439900  | -6.48992500 | 1.58968100  |

|   |             |             |             |
|---|-------------|-------------|-------------|
| H | 1.83720000  | 4.94483800  | 0.90983800  |
| H | 4.50663700  | 4.93296600  | 0.70479900  |
| H | 4.45029500  | -5.09943400 | 0.33544500  |
| H | 1.79448800  | -5.08993300 | 0.69503300  |
| H | -2.43367100 | 2.45433700  | 0.12888700  |
| H | -2.47051800 | -2.52444000 | 0.12338000  |
| H | 8.64830300  | 2.39349000  | -0.52046100 |
| H | 8.45762800  | -2.51983000 | -1.20096700 |
| H | 12.10709000 | 3.98048200  | 1.85715300  |
| H | 14.91132000 | -2.69044800 | -2.34232000 |
| H | -2.80223100 | 6.39694300  | 1.21502400  |
| H | -0.12270700 | 4.18132300  | -1.29958700 |
| H | -0.65362300 | 3.02457000  | 2.77028100  |
| H | 6.40006400  | 3.85370500  | -1.91208000 |
| H | 8.98899000  | 6.48843600  | 0.26616100  |
| H | 6.87946900  | 3.35300200  | 2.29677600  |
| H | 5.91928700  | -4.13783500 | -2.24866500 |
| H | 7.26364500  | -3.33795000 | 1.71910800  |
| H | 9.08971000  | -6.48288800 | -0.55556800 |
| H | -0.18391500 | -4.27794700 | -1.38301900 |
| H | -2.88636800 | -6.46807900 | 1.12921800  |
| H | -0.67291900 | -3.14516600 | 2.69887900  |
| H | 10.53144800 | -2.58395400 | -2.08009000 |
| H | 11.29743400 | 1.17001400  | -2.46111800 |
| H | 12.39747600 | 2.90272400  | -1.33290200 |
| H | 12.55628400 | -0.44319700 | -1.24797500 |

Atom coordinates for optimized structure **YH9**

|   | X           | Y           | Z          |
|---|-------------|-------------|------------|
| C | -1.28387500 | -0.72467100 | 0.42813000 |
| C | -1.28247300 | 0.68932800  | 0.47950800 |

|   |             |             |             |
|---|-------------|-------------|-------------|
| C | 0.11683900  | 1.09318400  | 0.62955500  |
| N | 0.91740800  | -0.02515100 | 0.60385200  |
| C | 0.11459300  | -1.14107800 | 0.55189200  |
| C | 3.74599900  | -4.19724800 | 0.67124400  |
| C | 2.39304800  | -4.19940700 | 0.80737900  |
| C | 1.94659900  | -2.83555800 | 0.65534000  |
| N | 3.03595400  | -2.01243700 | 0.46368000  |
| C | 4.14762400  | -2.83265400 | 0.43562300  |
| C | 0.58919300  | -2.45889000 | 0.65743900  |
| C | 7.25259600  | 0.70204800  | -0.39451600 |
| C | 7.24882500  | -0.70868900 | -0.42727800 |
| C | 5.90884700  | -1.12845200 | -0.03126200 |
| N | 5.12899000  | -0.01396400 | 0.16721800  |
| C | 5.91099000  | 1.10749500  | 0.01592500  |
| C | 5.47227100  | -2.45065100 | 0.16953000  |
| C | 2.40125500  | 4.12980000  | 1.04360100  |
| C | 3.75177800  | 4.13561000  | 0.88494700  |
| C | 4.14980100  | 2.78498400  | 0.57471400  |
| N | 3.03850000  | 1.96406400  | 0.57643600  |
| C | 1.95214200  | 2.77585900  | 0.82530200  |
| C | 0.59447700  | 2.40059300  | 0.81783100  |
| C | 5.47199100  | 2.41879300  | 0.27460100  |
| C | -0.39921500 | -3.57763100 | 0.81625500  |
| C | 6.48791900  | -3.55647500 | 0.13462400  |
| C | 6.47827700  | 3.53289100  | 0.24725700  |
| C | -0.39104900 | 3.50748400  | 1.05707500  |
| C | -1.04928800 | -3.76330800 | 2.04190400  |
| C | -1.98315700 | -4.79114400 | 2.21846800  |
| C | -2.23418000 | -5.63462400 | 1.12609000  |
| C | -1.59520700 | -5.48930800 | -0.11371600 |

|   |             |             |             |
|---|-------------|-------------|-------------|
| C | -0.67097000 | -4.44514600 | -0.24860000 |
| C | -0.67638700 | 4.43811300  | 0.05064500  |
| C | -1.59784900 | 5.47240800  | 0.26109900  |
| C | -2.21775200 | 5.54376000  | 1.51710800  |
| C | -1.95221600 | 4.63581800  | 2.55276900  |
| C | -1.02400200 | 3.61871000  | 2.30056600  |
| C | 6.57067200  | 4.37272800  | -0.86898000 |
| C | 7.53788100  | 5.38456900  | -0.93511500 |
| C | 8.40220200  | 5.52812700  | 0.16018600  |
| C | 8.32372500  | 4.72350400  | 1.30665300  |
| C | 7.34209600  | 3.72515800  | 1.33194000  |
| C | 7.31940300  | -3.76819900 | 1.24061900  |
| C | 8.29229000  | -4.77502400 | 1.23243700  |
| C | 8.40840400  | -5.55698400 | 0.07389200  |
| C | 7.59118000  | -5.38053600 | -1.05259800 |
| C | 6.61873600  | -4.37242900 | -0.99590100 |
| C | 8.41724000  | 1.39651800  | -0.75060600 |
| C | 9.57962200  | 0.72022400  | -1.13847600 |
| C | 9.54017500  | -0.70986100 | -1.27108800 |
| C | 8.38796000  | -1.39429600 | -0.87011300 |
| C | -2.47790400 | 1.39986700  | 0.33124200  |
| C | -3.68532800 | 0.71336900  | 0.14891700  |
| C | -3.68819800 | -0.72024300 | 0.10653800  |
| C | -2.48144500 | -1.42054400 | 0.23428800  |
| C | -4.90252600 | -1.43914200 | -0.05599400 |
| C | -5.93629500 | -2.07141300 | -0.17548300 |
| C | -7.15191600 | -2.79491900 | -0.31031700 |
| C | -8.39901400 | -2.14854900 | -0.18173500 |
| C | -7.15026100 | -4.18045100 | -0.57284900 |
| C | -8.33777600 | -4.88451200 | -0.71122400 |

|   |             |             |             |
|---|-------------|-------------|-------------|
| C | -9.58735700 | -2.85426800 | -0.30460700 |
| C | -9.57831900 | -4.23491500 | -0.57562700 |
| C | -4.89128200 | 1.44784400  | -0.00786600 |
| C | -5.91191700 | 2.09634400  | -0.15047200 |
| C | -7.10900600 | 2.84308100  | -0.32111600 |
| C | -7.17607300 | 4.20355200  | 0.04320700  |
| C | -8.26749700 | 2.24689900  | -0.86132200 |
| C | -9.43541700 | 2.97624500  | -1.03227800 |
| C | -8.34775200 | 4.93022700  | -0.11204600 |
| C | -9.49888800 | 4.33054700  | -0.65526500 |
| C | 7.78187500  | -6.28639300 | -2.28529300 |
| C | 6.86562400  | -5.87983200 | -3.45480800 |
| C | 7.45038700  | -7.74694500 | -1.89557600 |
| C | 9.24822600  | -6.20940100 | -2.77346500 |
| C | 9.22558400  | -5.03891300 | 2.43028300  |
| C | 9.03003000  | -6.49151000 | 2.92555700  |
| C | 10.69566000 | -4.84095600 | 1.99027600  |
| C | 8.94689600  | -4.08934600 | 3.61075600  |
| C | -1.94407500 | 6.51022200  | -0.82454900 |
| C | -3.45928600 | 6.45115000  | -1.13192400 |
| C | -1.57904500 | 7.92595900  | -0.31835200 |
| C | -1.17981600 | 6.25862200  | -2.13801700 |
| C | -2.68423800 | 4.77631900  | 3.90126600  |
| C | -2.26693200 | 3.68793000  | 4.90843600  |
| C | -4.20957300 | 4.65734500  | 3.66904100  |
| C | -2.36516200 | 6.15640400  | 4.52305000  |
| C | 7.68647100  | 6.31767700  | -2.15312700 |
| C | 6.63331000  | 6.03243100  | -3.24029000 |
| C | 7.52118700  | 7.78772400  | -1.69967800 |
| C | 9.08912600  | 6.12823600  | -2.77797300 |

|    |              |             |             |
|----|--------------|-------------|-------------|
| C  | 9.31280900   | 4.94775700  | 2.46708100  |
| C  | 9.05279200   | 3.99508300  | 3.64944000  |
| C  | 10.75584200  | 4.70701400  | 1.96210200  |
| C  | 9.18344900   | 6.39989500  | 2.98437800  |
| C  | -1.92526500  | -6.45977400 | -1.26475500 |
| C  | -3.43416100  | -6.37283900 | -1.59724600 |
| C  | -1.57852800  | -7.90524400 | -0.83591800 |
| C  | -1.13478100  | -6.13758100 | -2.54717500 |
| C  | -2.73882600  | -5.00920900 | 3.54338900  |
| C  | -2.43198500  | -6.42390400 | 4.08852600  |
| C  | -4.25958700  | -4.87297900 | 3.29081900  |
| C  | -2.33722700  | -3.98318300 | 4.61968900  |
| Zn | 3.02471500   | -0.02208000 | 0.45237500  |
| C  | 10.76056700  | 1.58002800  | -1.25597400 |
| C  | 12.05814700  | 1.29045700  | -1.03849200 |
| C  | 13.06581000  | 2.37811900  | -1.09392300 |
| O  | 14.34920900  | 2.00673900  | -0.81884000 |
| O  | 12.82389800  | 3.53539400  | -1.35953700 |
| C  | 10.54293800  | -1.56226800 | -1.91630300 |
| C  | 11.42487800  | -1.27079400 | -2.89141000 |
| C  | 12.24000500  | -2.36192000 | -3.47965300 |
| O  | 13.08964300  | -1.99049200 | -4.47935600 |
| O  | 12.19578100  | -3.52351900 | -3.13610200 |
| N  | -10.69185800 | 5.07312700  | -0.81924500 |
| C  | -11.95814400 | 4.46024500  | -0.60126300 |
| C  | -10.53468600 | 9.14960300  | -1.95334000 |
| C  | -9.72391500  | 8.20859500  | -2.59115800 |
| C  | -9.77725900  | 6.86469500  | -2.22710200 |
| C  | -11.39678700 | 8.73212000  | -0.93747400 |
| C  | -10.63552700 | 6.44452100  | -1.19886800 |

|   |              |             |             |
|---|--------------|-------------|-------------|
| C | -11.44393400 | 7.39331700  | -0.55397900 |
| C | -12.16126200 | 3.61015600  | 0.49744100  |
| C | -13.40261700 | 3.01112100  | 0.70122600  |
| C | -13.02490900 | 4.70497500  | -1.48026900 |
| C | -14.26778100 | 4.11606900  | -1.25710100 |
| C | -14.46447800 | 3.26262000  | -0.16988300 |
| N | -10.78918000 | -4.95572500 | -0.70692000 |
| C | -10.89145500 | -6.28061400 | -0.19543800 |
| C | -11.91572800 | -4.36022000 | -1.34136700 |
| C | -10.37515700 | -6.59695700 | 1.07103500  |
| C | -10.47286500 | -7.89641800 | 1.56417800  |
| C | -11.10064600 | -8.89434100 | 0.81608900  |
| C | -11.51526500 | -7.28717200 | -0.94900200 |
| C | -11.62425400 | -8.57952200 | -0.43939100 |
| C | -11.75957100 | -3.61750200 | -2.52251100 |
| C | -12.86587900 | -3.03264000 | -3.13506500 |
| C | -14.14386600 | -3.19282900 | -2.59589300 |
| C | -13.20057600 | -4.51337800 | -0.79698500 |
| C | -14.30303100 | -3.94032600 | -1.42754800 |
| H | 4.41709400   | -5.04085100 | 0.72079900  |
| H | 1.74931000   | -5.04559200 | 0.99009500  |
| H | 1.76073300   | 4.96488400  | 1.28077200  |
| H | 4.42404900   | 4.97566900  | 0.96755300  |
| H | -0.82033000  | -3.07966800 | 2.85043300  |
| H | -2.95592300  | -6.43633000 | 1.24591400  |
| H | -0.15399700  | -4.28199600 | -1.18638300 |
| H | -0.17297500  | 4.33116200  | -0.90257100 |
| H | -2.93502400  | 6.33863200  | 1.69623200  |
| H | -0.78478200  | 2.88752100  | 3.06321500  |
| H | 5.88474700   | 4.20875500  | -1.69135900 |

|   |              |             |             |
|---|--------------|-------------|-------------|
| H | 9.16661000   | 6.29716500  | 0.11952000  |
| H | 7.24636400   | 3.06709600  | 2.18714700  |
| H | 7.19675700   | -3.12618400 | 2.10447600  |
| H | 9.16475300   | -6.33470100 | 0.04751600  |
| H | 5.96251200   | -4.19048700 | -1.83852200 |
| H | 8.45275800   | 2.47472100  | -0.70103800 |
| H | 8.37704100   | -2.47027200 | -0.96857300 |
| H | -2.50293400  | 2.47878300  | 0.33706700  |
| H | -2.50975400  | -2.49764100 | 0.17298500  |
| H | -8.42197200  | -1.08649900 | 0.04025900  |
| H | -6.20160700  | -4.69551600 | -0.68434000 |
| H | -8.31364700  | -5.94656800 | -0.92921200 |
| H | -10.53508400 | -2.34060700 | -0.18677500 |
| H | -6.29814100  | 4.67911100  | 0.46831000  |
| H | -8.23142000  | 1.20653800  | -1.16819100 |
| H | -10.30949700 | 2.50127600  | -1.46390900 |
| H | -8.38100700  | 5.97108300  | 0.19032500  |
| H | 7.04483900   | -6.54081400 | -4.30865400 |
| H | 7.05952600   | -4.85423200 | -3.78539000 |
| H | 5.80539000   | -5.96134100 | -3.19384100 |
| H | 7.59038100   | -8.41183000 | -2.75523900 |
| H | 6.41181400   | -7.83871500 | -1.56051200 |
| H | 8.09501500   | -8.10650100 | -1.08797100 |
| H | 9.38340700   | -6.84159000 | -3.65794300 |
| H | 9.95393400   | -6.55611700 | -2.01354700 |
| H | 9.53375100   | -5.18797200 | -3.04302100 |
| H | 9.25854000   | -7.22272400 | 2.14489000  |
| H | 7.99763100   | -6.65955000 | 3.24923500  |
| H | 9.69021200   | -6.69579500 | 3.77582300  |
| H | 10.97505100  | -5.51686700 | 1.17714900  |



|   |             |             |             |
|---|-------------|-------------|-------------|
| H | 11.37300600 | -5.03222400 | 2.83014800  |
| H | 10.86550600 | -3.81599500 | 1.64465600  |
| H | 9.10103600  | -3.04064200 | 3.33680400  |
| H | 9.63005300  | -4.31755900 | 4.43509700  |
| H | 7.92534200  | -4.19742500 | 3.98954200  |
| H | -3.71853300 | 7.17838900  | -1.90954300 |
| H | -4.06390400 | 6.68197300  | -0.24972200 |
| H | -3.74993100 | 5.45684500  | -1.48576300 |
| H | -1.82814000 | 8.67716500  | -1.07627900 |
| H | -0.50772200 | 8.00206600  | -0.10506900 |
| H | -2.12019200 | 8.18467600  | 0.59653400  |
| H | -1.45644100 | 7.01825100  | -2.87608200 |
| H | -1.41842800 | 5.28006000  | -2.56659700 |
| H | -0.09565800 | 6.31573300  | -1.99693600 |
| H | -2.49872200 | 2.68298100  | 4.54161200  |
| H | -2.80970900 | 3.82954300  | 5.84848500  |
| H | -1.19684400 | 3.73145100  | 5.13591000  |
| H | -4.58359600 | 5.44853500  | 3.01222000  |
| H | -4.74693300 | 4.73570700  | 4.62080100  |
| H | -4.46344800 | 3.69551200  | 3.21218800  |
| H | -2.67176100 | 6.97890000  | 3.87007500  |
| H | -1.29184800 | 6.26254700  | 4.71184800  |
| H | -2.89091800 | 6.27519400  | 5.47706800  |
| H | 6.77463100  | 6.72226800  | -4.07835700 |
| H | 5.61327500  | 6.17056700  | -2.86705000 |
| H | 6.71853200  | 5.01483400  | -3.63491700 |
| H | 7.62509400  | 8.46307600  | -2.55617300 |
| H | 8.27312600  | 8.07462700  | -0.95898400 |
| H | 6.53401600  | 7.95254800  | -1.25544200 |
| H | 9.21603400  | 6.79659400  | -3.63700900 |

|   |             |             |             |
|---|-------------|-------------|-------------|
| H | 9.22629400  | 5.09981300  | -3.12782400 |
| H | 9.89021000  | 6.34524000  | -2.06587000 |
| H | 9.16977900  | 2.94534900  | 3.36147300  |
| H | 8.04914200  | 4.12590900  | 4.06740800  |
| H | 9.77258000  | 4.19769400  | 4.44887300  |
| H | 11.02199700 | 5.37228100  | 1.13617100  |
| H | 10.88110000 | 3.67897300  | 1.60756100  |
| H | 11.47451900 | 4.87637500  | 2.77177200  |
| H | 9.40773600  | 7.13338900  | 2.20473300  |
| H | 9.88121900  | 6.57180500  | 3.81134100  |
| H | 8.16994100  | 6.59797300  | 3.34861600  |
| H | -3.68437200 | -7.05711800 | -2.41567900 |
| H | -3.70773800 | -5.35871500 | -1.90674300 |
| H | -4.05637600 | -6.64219200 | -0.73837400 |
| H | -1.81627600 | -8.60876500 | -1.64166900 |
| H | -2.13923300 | -8.21357000 | 0.05127700  |
| H | -0.51215900 | -8.00074200 | -0.60649600 |
| H | -1.40224700 | -6.85121700 | -3.33300200 |
| H | -0.05387500 | -6.21078000 | -2.38963700 |
| H | -1.35898400 | -5.13415800 | -2.92289100 |
| H | -2.73183200 | -7.20647800 | 3.38530300  |
| H | -2.97111300 | -6.59608800 | 5.02691300  |
| H | -1.36162000 | -6.54427300 | 4.28568000  |
| H | -4.62384100 | -5.62364500 | 2.58320500  |
| H | -4.50396700 | -3.88687100 | 2.88342200  |
| H | -4.81375600 | -5.00310100 | 4.22720000  |
| H | -2.55923100 | -2.95772300 | 4.30783400  |
| H | -1.27170600 | -4.04432500 | 4.86426800  |
| H | -2.89811300 | -4.17688900 | 5.53962300  |
| H | 10.54939700 | 2.63264100  | -1.44160500 |

|   |              |             |             |
|---|--------------|-------------|-------------|
| H | 12.38280000  | 0.28084500  | -0.80390300 |
| H | 14.38728400  | 1.06229300  | -0.61175800 |
| H | 10.49479700  | -2.61541700 | -1.64166500 |
| H | 11.53783500  | -0.26055400 | -3.27400500 |
| H | 13.00805600  | -1.04208000 | -4.65328000 |
| H | -10.49581000 | 10.19458600 | -2.24486800 |
| H | -9.05474600  | 8.51751100  | -3.38907400 |
| H | -9.15670600  | 6.13410700  | -2.73521900 |
| H | -12.02888100 | 9.45405700  | -0.42842100 |
| H | -12.10589700 | 7.07418700  | 0.24410900  |
| H | -11.34374500 | 3.42343900  | 1.18561500  |
| H | -13.54269000 | 2.35569500  | 1.55600900  |
| H | -12.87318400 | 5.35702700  | -2.33387400 |
| H | -15.08260400 | 4.31633700  | -1.94694200 |
| H | -15.43222000 | 2.79987400  | -0.00327400 |
| H | -9.89977100  | -5.82080600 | 1.66134900  |
| H | -10.06869500 | -8.12462700 | 2.54626100  |
| H | -11.18150200 | -9.90395700 | 1.20675700  |
| H | -11.91195400 | -7.04922600 | -1.93030000 |
| H | -12.10984000 | -9.34710700 | -1.03513000 |
| H | -10.77063900 | -3.50293300 | -2.95344200 |
| H | -12.72765000 | -2.46059300 | -4.04803100 |
| H | -15.00416400 | -2.74157700 | -3.08034600 |
| H | -13.32701400 | -5.08260000 | 0.11774200  |
| H | -15.29033600 | -4.06867800 | -0.99316100 |

Atom coordinates for optimized structure **YH10**

|   | X           | Y           | Z          |
|---|-------------|-------------|------------|
| C | 0.85860500  | 0.74958100  | 0.34935200 |
| C | 0.84884200  | -0.66588400 | 0.34498100 |
| C | -0.55373000 | -1.06693400 | 0.45825600 |

|   |             |             |             |
|---|-------------|-------------|-------------|
| N | -1.34649000 | 0.05676300  | 0.46348200  |
| C | -0.53874600 | 1.16902700  | 0.46333000  |
| C | -4.15409800 | 4.24226800  | 0.54550200  |
| C | -2.80708800 | 4.23316400  | 0.73214400  |
| C | -2.36283800 | 2.87063900  | 0.56740500  |
| N | -3.45116800 | 2.05754300  | 0.32349300  |
| C | -4.55497700 | 2.88486600  | 0.27070100  |
| C | -1.00921900 | 2.48666900  | 0.59853300  |
| C | -7.69345600 | -0.62339100 | -0.56959800 |
| C | -7.65584200 | 0.78620700  | -0.66835300 |
| C | -6.31849400 | 1.19658500  | -0.24485900 |
| N | -5.56146900 | 0.07667600  | -0.00163600 |
| C | -6.36068000 | -1.03619000 | -0.12733400 |
| C | -5.87462200 | 2.51491000  | -0.04357500 |
| C | -2.85770200 | -4.09228600 | 0.82434200  |
| C | -4.21249800 | -4.08089100 | 0.71039500  |
| C | -4.60561500 | -2.72216200 | 0.42778600  |
| N | -3.48580600 | -1.91400500 | 0.40587800  |
| C | -2.40091800 | -2.74010200 | 0.61725000  |
| C | -1.04107200 | -2.37664500 | 0.60147600  |
| C | -5.93353000 | -2.34424900 | 0.15717600  |
| C | -0.01876800 | 3.59265000  | 0.81982400  |
| C | -6.87281300 | 3.63362300  | -0.11838900 |
| C | -6.94275600 | -3.45607400 | 0.22496300  |
| C | -0.06462600 | -3.50167600 | 0.79174100  |
| C | 0.60197500  | 3.73181900  | 2.06681500  |
| C | 1.53719200  | 4.74667500  | 2.30170000  |
| C | 1.82087400  | 5.62492900  | 1.24529300  |
| C | 1.21118900  | 5.52727500  | -0.01388900 |
| C | 0.28436500  | 4.49446000  | -0.20744000 |

|   |             |             |             |
|---|-------------|-------------|-------------|
| C | 0.22365200  | -4.37821600 | -0.26112600 |
| C | 1.13246800  | -5.43206200 | -0.09748100 |
| C | 1.73574200  | -5.57914900 | 1.16003900  |
| C | 1.46689200  | -4.72653100 | 2.24114400  |
| C | 0.55239500  | -3.68672100 | 2.03437900  |
| C | -7.15362700 | -4.30814700 | -0.87018300 |
| C | -8.06904300 | -5.36176100 | -0.79311800 |
| C | -8.74898000 | -5.55523200 | 0.42351000  |
| C | -8.54765900 | -4.74118900 | 1.54290000  |
| C | -7.63716700 | -3.67967000 | 1.41379100  |
| C | -7.77978600 | 3.82775700  | 0.93012500  |
| C | -8.73263100 | 4.85226400  | 0.88305800  |
| C | -8.74443000 | 5.67631800  | -0.25198300 |
| C | -7.84522800 | 5.52280500  | -1.31756600 |
| C | -6.90375400 | 4.48843000  | -1.22709500 |
| C | -8.84029300 | -1.32198900 | -0.97185400 |
| C | -9.94126300 | -0.63595600 | -1.48999300 |
| C | -9.90416600 | 0.79114000  | -1.59031800 |
| C | -8.75290400 | 1.47834500  | -1.18772800 |
| C | 2.04425100  | -1.37797300 | 0.19709000  |
| C | 3.25752500  | -0.69127700 | 0.07282500  |
| C | 3.26814100  | 0.74242400  | 0.08299200  |
| C | 2.06447800  | 1.44562900  | 0.20784300  |
| C | 4.49315000  | 1.45658600  | -0.02136000 |
| C | 5.53917800  | 2.07412700  | -0.09140400 |
| C | 6.77840800  | 2.77032800  | -0.16595300 |
| C | 7.98622900  | 2.11491300  | 0.14916400  |
| C | 6.82622600  | 4.12502300  | -0.55354600 |
| C | 8.04245600  | 4.79594400  | -0.62714800 |
| C | 9.19887200  | 2.79240200  | 0.07554200  |

|   |              |             |             |
|---|--------------|-------------|-------------|
| C | 9.23768600   | 4.13488600  | -0.31330700 |
| C | 4.46621400   | -1.42488300 | -0.07435500 |
| C | 5.49132600   | -2.06779100 | -0.20187300 |
| C | 6.69932700   | -2.80625700 | -0.34633800 |
| C | 6.74286100   | -4.18276000 | -0.04735100 |
| C | 7.87965300   | -2.17252900 | -0.78727800 |
| C | 9.06274400   | -2.89264000 | -0.91472500 |
| C | 7.92953300   | -4.89694000 | -0.17630700 |
| C | 9.09732300   | -4.25955400 | -0.60657900 |
| C | -7.91823500  | 6.48015500  | -2.52327000 |
| C | -6.87869800  | 6.13550700  | -3.60645900 |
| C | -7.65099500  | 7.92647900  | -2.04217100 |
| C | -9.32445300  | 6.40503500  | -3.16360200 |
| C | -9.74992900  | 5.09159700  | 2.01566900  |
| C | -9.56462800  | 6.51977600  | 2.58076100  |
| C | -11.18521300 | 4.94138400  | 1.45770300  |
| C | -9.57942700  | 4.09164100  | 3.17521800  |
| C | 1.47901900   | -6.41377000 | -1.23406400 |
| C | 3.00039900   | -6.36872300 | -1.51230300 |
| C | 1.07749200   | -7.84777300 | -0.81453400 |
| C | 0.74439800   | -6.07351200 | -2.54475100 |
| C | 2.17730500   | -4.95296400 | 3.58964200  |
| C | 1.77081400   | -3.90859100 | 4.64634500  |
| C | 3.70816700   | -4.85876800 | 3.38340000  |
| C | 1.81716900   | -6.35533600 | 4.13393500  |
| C | -8.34817100  | -6.30802500 | -1.97781600 |
| C | -7.51846500  | -5.95012700 | -3.22536700 |
| C | -8.00622900  | -7.76163300 | -1.57361700 |
| C | -9.84619300  | -6.22630100 | -2.36061400 |
| C | -9.23143900  | -5.00770400 | 2.89837800  |

|    |              |             |             |
|----|--------------|-------------|-------------|
| C  | -9.82074100  | -3.69976300 | 3.47595600  |
| C  | -10.37747600 | -6.03134100 | 2.78074700  |
| C  | -8.16813600  | -5.56520700 | 3.87579500  |
| C  | 1.57527800   | 6.53424900  | -1.12251300 |
| C  | 3.08765200   | 6.43284700  | -1.43454600 |
| C  | 1.24653200   | 7.96905400  | -0.64631100 |
| C  | 0.79955700   | 6.27329200  | -2.42742800 |
| C  | 2.25908700   | 4.91475900  | 3.65251100  |
| C  | 1.95398700   | 6.31577400  | 4.23298100  |
| C  | 3.78434600   | 4.76812600  | 3.43615000  |
| C  | 1.81730600   | 3.86107800  | 4.68571900  |
| Zn | -3.45936100  | 0.06977000  | 0.30193000  |
| C  | -11.02863500 | -1.40356200 | -2.12105200 |
| C  | -11.69366100 | -2.48373900 | -1.66645000 |
| C  | -11.65588500 | -3.00807000 | -0.27557700 |
| O  | -12.04480600 | -4.31071100 | -0.14366900 |
| O  | -11.37712900 | -2.36412300 | 0.70862400  |
| C  | -11.01025300 | 1.61456800  | -2.07007700 |
| C  | -12.32845000 | 1.33298200  | -2.10237400 |
| C  | -13.28015500 | 2.34981700  | -2.61702200 |
| O  | -14.60128100 | 2.02811500  | -2.50854000 |
| O  | -12.96125200 | 3.40814700  | -3.11150700 |
| N  | 10.30738100  | -5.02748300 | -0.71675600 |
| C  | 11.24415100  | -4.96412200 | 0.35038700  |
| C  | 10.47834900  | -5.52332200 | -4.42249600 |
| C  | 10.68271000  | -5.51774600 | -1.99657600 |
| C  | 11.18011900  | -3.96103100 | 1.33019400  |
| C  | 13.20963800  | -5.85632200 | 1.48146100  |
| C  | 13.12839000  | -4.85949500 | 2.45354400  |
| N  | 10.50885400  | 4.80222000  | -0.38283600 |

|   |             |             |             |
|---|-------------|-------------|-------------|
| C | 10.90222800 | 5.62280600  | 0.70862300  |
| C | 11.14509600 | 4.90621600  | -1.64947700 |
| C | 12.10313900 | -3.92037500 | 2.37532900  |
| S | 12.28736700 | -7.32537800 | -0.64788300 |
| C | 12.26529300 | -5.92879900 | 0.45675500  |
| C | 12.05241400 | -6.99791700 | -3.36442700 |
| C | 11.46088900 | -6.50467600 | -4.52719100 |
| C | 10.10246200 | -5.02383300 | -3.17538600 |
| C | 11.65171300 | -6.53399400 | -2.11101100 |
| S | 13.48772900 | 5.37788000  | -0.25172900 |
| C | 12.24467400 | 6.02844300  | 0.84468200  |
| C | 12.63379000 | 6.86134100  | 1.89435500  |
| C | 11.71345100 | 7.26299700  | 2.86227000  |
| C | 10.39127100 | 6.83945300  | 2.75498300  |
| C | 9.98492900  | 6.04191600  | 1.68497200  |
| C | 13.13508600 | 5.37714400  | -2.97462600 |
| C | 12.43407100 | 5.12796000  | -4.15434500 |
| C | 11.09183900 | 4.76469000  | -4.07956900 |
| C | 10.44914300 | 4.66884100  | -2.84518600 |
| C | 12.51062500 | 5.24201000  | -1.73414000 |
| H | -4.82179600 | 5.08867400  | 0.58925900  |
| H | -2.16632300 | 5.07149000  | 0.95682200  |
| H | -2.21966300 | -4.93825100 | 1.02731100  |
| H | -4.88925800 | -4.91604000 | 0.80162200  |
| H | 0.34786100  | 3.02362200  | 2.84616000  |
| H | 2.54408500  | 6.41724000  | 1.41094600  |
| H | -0.21124500 | 4.36736000  | -1.16223700 |
| H | -0.26876500 | -4.21508800 | -1.21210600 |
| H | 2.44065000  | -6.39194200 | 1.30410700  |
| H | 0.31043100  | -2.99621200 | 2.83329500  |



|   |              |             |             |
|---|--------------|-------------|-------------|
| H | -6.59410500  | -4.12373000 | -1.77954700 |
| H | -9.45450600  | -6.37357700 | 0.49566000  |
| H | -7.44926500  | -3.01924400 | 2.25342200  |
| H | -7.73270000  | 3.15670700  | 1.77919300  |
| H | -9.48199900  | 6.47054100  | -0.30717200 |
| H | -6.18808000  | 4.32105600  | -2.02315500 |
| H | -8.86501300  | -2.40110500 | -0.95059400 |
| H | -8.73437500  | 2.55353500  | -1.29552900 |
| H | 2.06299700   | -2.45647700 | 0.16297000  |
| H | 2.09957100   | 2.52416600  | 0.18904200  |
| H | 7.95774900   | 1.07540600  | 0.45856000  |
| H | 5.90247700   | 4.63926500  | -0.79713500 |
| H | 8.07450800   | 5.83809200  | -0.92964500 |
| H | 10.12933200  | 2.29021600  | 0.31971400  |
| H | 5.83896800   | -4.67891600 | 0.28972000  |
| H | 7.85360500   | -1.11547500 | -1.03047100 |
| H | 9.96910300   | -2.40012700 | -1.25311300 |
| H | 7.96611200   | -5.95591600 | 0.05755300  |
| H | -6.97244000  | 6.83676300  | -4.44163700 |
| H | -7.02532800  | 5.12659600  | -4.00560200 |
| H | -5.85367900  | 6.20841900  | -3.22843500 |
| H | -7.69959200  | 8.62396300  | -2.88582900 |
| H | -6.65797000  | 8.01139200  | -1.58845000 |
| H | -8.38614700  | 8.25087600  | -1.29992000 |
| H | -9.38834500  | 7.08500200  | -4.02038400 |
| H | -10.11291900 | 6.68559900  | -2.45975700 |
| H | -9.54433400  | 5.39335000  | -3.51943700 |
| H | -9.71696500  | 7.28558300  | 1.81467600  |
| H | -8.55737600  | 6.65144500  | 2.98949100  |
| H | -10.28451400 | 6.70683100  | 3.38526800  |

|   |              |             |             |
|---|--------------|-------------|-------------|
| H | -11.38969300 | 5.65497200  | 0.65443300  |
| H | -11.92104600 | 5.11364000  | 2.25109200  |
| H | -11.34699200 | 3.93526100  | 1.05775000  |
| H | -9.73111900  | 3.05790900  | 2.84852900  |
| H | -10.31969700 | 4.30222600  | 3.95360100  |
| H | -8.58844200  | 4.16431500  | 3.63511900  |
| H | 3.25888700   | -7.05515100 | -2.32620500 |
| H | 3.58469100   | -6.66299800 | -0.63535800 |
| H | 3.31661900   | -5.36197000 | -1.80382500 |
| H | 1.32544900   | -8.56056400 | -1.60892800 |
| H | 0.00128100   | -7.91336200 | -0.62381700 |
| H | 1.59725600   | -8.16722500 | 0.09346000  |
| H | 1.02398800   | -6.79364900 | -3.32031400 |
| H | 1.00619200   | -5.07579000 | -2.91144100 |
| H | -0.34312200  | -6.12130500 | -2.42806500 |
| H | 2.02505000   | -2.89111300 | 4.33265400  |
| H | 2.30124400   | -4.10757200 | 5.58300400  |
| H | 0.69794600   | -3.94286100 | 4.86189300  |
| H | 4.07329600   | -5.62601800 | 2.69392200  |
| H | 4.23056800   | -4.99569700 | 4.33668200  |
| H | 3.99019500   | -3.88194800 | 2.97739400  |
| H | 2.11475300   | -7.14962400 | 3.44303500  |
| H | 0.73886100   | -6.44508700 | 4.30139400  |
| H | 2.32472800   | -6.53652300 | 5.08805300  |
| H | -7.75450800  | -6.64505900 | -4.03772400 |
| H | -6.44346000  | -6.02217500 | -3.03249900 |
| H | -7.73372500  | -4.93798600 | -3.58291800 |
| H | -8.20728500  | -8.44691300 | -2.40481600 |
| H | -8.59558200  | -8.09630600 | -0.71529300 |
| H | -6.94831900  | -7.85300700 | -1.30738600 |

|   |              |             |             |
|---|--------------|-------------|-------------|
| H | -10.06663700 | -6.90072300 | -3.19555100 |
| H | -10.11010700 | -5.20799700 | -2.66923200 |
| H | -10.49016500 | -6.51146900 | -1.52271500 |
| H | -10.53987600 | -3.25446900 | 2.78413900  |
| H | -9.04557500  | -2.95633200 | 3.68528800  |
| H | -10.32794800 | -3.91095700 | 4.42408400  |
| H | -10.01854500 | -7.01936800 | 2.47252800  |
| H | -11.13805400 | -5.69725900 | 2.06889500  |
| H | -10.85867300 | -6.15456600 | 3.75638700  |
| H | -7.74267900  | -6.50389300 | 3.50451900  |
| H | -8.61670400  | -5.76010800 | 4.85662900  |
| H | -7.34494700  | -4.85771700 | 4.01730700  |
| H | 3.36331100   | 7.14375200  | -2.22150700 |
| H | 3.34698200   | 5.42627500  | -1.77971700 |
| H | 3.70013800   | 6.65615500  | -0.55567700 |
| H | 1.50683900   | 8.69667000  | -1.42312000 |
| H | 1.79967800   | 8.23692100  | 0.25857300  |
| H | 0.17879300   | 8.07409200  | -0.42793100 |
| H | 1.08685900   | 7.01350900  | -3.18093600 |
| H | -0.28237200  | 6.35412500  | -2.28139600 |
| H | 1.01612300   | 5.28255400  | -2.83951400 |
| H | 2.27945300   | 7.11589000  | 3.56163400  |
| H | 2.47143100   | 6.45293600  | 5.18905900  |
| H | 0.88048300   | 6.44247900  | 4.40743000  |
| H | 4.17476200   | 5.53308600  | 2.75840000  |
| H | 4.02850500   | 3.79000000  | 3.00956500  |
| H | 4.31517900   | 4.86696100  | 4.38963000  |
| H | 2.03782900   | 2.84292300  | 4.34962900  |
| H | 0.74600900   | 3.92616100  | 4.90213900  |
| H | 2.35385500   | 4.02134800  | 5.62630300  |

|   |              |             |             |
|---|--------------|-------------|-------------|
| H | -11.28945700 | -1.06888900 | -3.12548300 |
| H | -12.38530900 | -2.97771800 | -2.34731000 |
| H | -12.11880500 | -4.72740700 | -1.01427200 |
| H | -10.74000500 | 2.61431500  | -2.40782500 |
| H | -12.71692300 | 0.39325600  | -1.72039800 |
| H | -14.70123700 | 1.17558700  | -2.06218000 |
| H | 10.00167800  | -5.12741100 | -5.31418300 |
| H | 10.39807400  | -3.21399000 | 1.28385400  |
| H | 13.99740700  | -6.60255200 | 1.52245500  |
| H | 13.85557600  | -4.82286500 | 3.25824600  |
| H | 12.01866300  | -3.13760500 | 3.12312100  |
| H | 12.81807000  | -7.76595100 | -3.41916000 |
| H | 11.76458100  | -6.88597500 | -5.49678600 |
| H | 9.34425900   | -4.25319800 | -3.11872900 |
| H | 13.67172100  | 7.17401100  | 1.95819700  |
| H | 12.03017000  | 7.89385700  | 3.68653600  |
| H | 9.65850300   | 7.13559600  | 3.49960500  |
| H | 8.94982500   | 5.73261800  | 1.61657600  |
| H | 14.18342800  | 5.65844200  | -3.00604300 |
| H | 12.93381500  | 5.21515600  | -5.11369200 |
| H | 10.52726700  | 4.56246900  | -4.98480400 |
| H | 9.40233400   | 4.39509300  | -2.81184300 |

## REFERENCE

1. Dong, L.; Zheng, Z.; Wang, Y.; Li, X.; Hua, J.; Hu, A., Co-sensitization of N719 with polyphenylene from Bergman cyclization of maleimide-based enediyne for dye-sensitized solar cells. *J. Mater. Chem. A* **2015**, *3*, 11607.
2. Delor, M.; Keane, T.; Scattergood, P. A.; Sazanovich, I. V.; Greetham, G. M., Towrie, M.; Meijer, A. J. H. M.; Weinstein, J. A. On the mechanism of vibrational control of light-induced charge transfer in donor–bridge–acceptor assemblies. *Nature Chemistry* **2015**, *7*, 689.
3. Hu, Y.; Webre, W. A.; Thomas, M. B.; Moss, A.; Hancock, S. N.; Schaffner, J.; D'souza, F. Wang, H.,  $\beta$ -Functionalized push–pull opp-dibenzoporphyrins as sensitizers for dye-sensitized solar cells: the role of the phenylethynyl bridge. *J. Mater. Chem. A* **2019**, *7*, 10712.
4. Gaussian 09, Revision A.02, M. J. Frisch, G. W. Trucks, H. B. Schlegel, G. E. Scuseria, M. A. Robb, J. R. Cheeseman, G. Scalmani, V. Barone, B. Mennucci, G. A. Petersson, H. Nakatsuji, M. Caricato, X. Li, H. P. Hratchian, A. F. Izmaylov, J. Bloino, G. Zheng, J. L. Sonnenberg, M. Hada, M. Ehara, K. Toyota, R. Fukuda, J. Hasegawa, M. Ishida, T. Nakajima, Y. Honda, O. Kitao, H. Nakai, T. Vreven, J. A. Montgomery, Jr., J. E. Peralta, F. Ogliaro, M. Bearpark, J. J. Heyd, E. Brothers, K. N. Kudin, V. N. Staroverov, R. Kobayashi, J. Normand, K. Raghavachari, A. Rendell, J. C. Burant, S. S. Iyengar, J. Tomasi, M. Cossi, N. Rega, J. M. Millam, M. Klene, J. E. Knox, J. B. Cross, V. Bakken, C. Adamo, J. Jaramillo, R. Gomperts, R. E. Stratmann, O. Yazyev, A. J. Austin, R. Cammi, C. Pomelli, J. W. Ochterski, R. L. Martin, K. Morokuma, V. G. Zakrzewski, G. A. Voth, P. Salvador, J. J. Dannenberg, S. Dapprich, A. D. Daniels, O. Farkas, J. B. Foresman, J. V. Ortiz, J. Cioslowski, and D. J. Fox, Gaussian, Inc., Wallingford CT, 2009
